# Supplementary material for: Histone H3 threonine 11 phosphorylation by Sch9 and CK2 regulates chronological lifespan by controlling the nutritional stress response
Source: eLife. 2018 Jun 25;7:e36157. doi: 10.7554/eLife.36157 (PMC6042962; doi:10.7554/eLife.36157)
Supplement: Figure 1—source data 1. [file elife-36157-fig1-data1.xlsx]

## Sheet: 366 genes upregulated
diffbind_chrom	diffbind_start	diffbind_end	diffbind_name	closest_tss_chrom	closest_tss_start	closest_tss_end	closest_gene	score	gene_strand	seqnames	start	end	width	strand	Conc	Conc_gly_pt11	Conc_w_pt11	Fold	p.value	FDR
chrI	33074	34001	chrI:33074-34001	chrI	33446	33447	YAL061W	1	+	chrI	33074	34001	928	*	8.43071	9.42833	0.181105	9.24723	8.12489e-62	5.03743e-60
chrI	45055	45929	chrI:45055-45929	chrI	45897	45898	YAL053W	1	+	chrI	45055	45929	875	*	8.03616	8.5157	7.31285	1.20285	3.52844e-05	0.000185243
chrI	68023	70150	chrI:68023-70150	chrI	69525	69526	YAL039C	1	-	chrI	68023	70150	2128	*	9.31335	9.70353	8.77685	0.92668	0.00172371	0.00518307
chrI	92388	92822	chrI:92388-92822	chrI	92898	92899	YAL028W	1	+	chrI	92388	92822	435	*	7.48213	8.0384	6.56494	1.47346	1.69732e-06	1.16927e-05
chrI	140891	142514	chrI:140891-142514	chrI	141431	141432	YAL005C	1	-	chrI	140891	142514	1624	*	9.83584	10.2546	9.24333	1.0113	0.000202694	0.00082214
chrI	192558	192669	chrI:192558-192669	chrI	192617	192618	YAR042W	1	+	chrI	192558	192669	112	*	6.17679	7.00403	4.0294	2.97463	2.2987e-10	2.64859e-09
chrII	96033	96052	chrII:96033-96052	chrII	95882	95883	YBL067C	1	-	chrII	96033	96052	20	*	5.37035	6.35044	0.181105	6.16934	2.09015e-22	4.53562e-21
chrII	135493	136465	chrII:135493-136465	chrII	135516	135517	YBL045C	1	-	chrII	135493	136465	973	*	8.40935	8.71823	8.01579	0.702444	0.0154807	0.0342786
chrII	163955	164392	chrII:163955-164392	chrII	163997	163998	YBL030C	1	-	chrII	163955	164392	438	*	7.67449	8.12987	7.00528	1.12459	0.000226369	0.000906867
chrII	167733	168867	chrII:167733-168867	chrII	167838	167839	YBL028C	1	-	chrII	167733	168867	1135	*	8.91662	9.23131	8.51356	0.717754	0.0102569	0.0241056
chrII	191696	192213	chrII:191696-192213	chrII	191583	191584	YBL017C	1	-	chrII	191696	192213	518	*	7.47739	8.00673	6.63244	1.37429	6.54116e-06	3.97972e-05
chrII	193742	194131	chrII:193742-194131	chrII	194120	194121	YBL015W	1	+	chrII	193742	194131	390	*	7.26403	7.99888	5.68961	2.30927	1.41541e-12	1.98157e-11
chrII	241336	241603	chrII:241336-241603	chrII	241283	241284	YBR001C	1	-	chrII	241336	241603	268	*	7.00266	7.42767	6.39753	1.03015	0.00357135	0.00976871
chrII	297956	298147	chrII:297956-298147	chrII	298290	298291	YBR030W	1	+	chrII	297956	298147	192	*	6.44412	7.18951	4.81632	2.37318	0.000154513	0.000655297
chrII	338719	339536	chrII:338719-339536	chrII	339352	339353	YBR052C	1	-	chrII	338719	339536	818	*	7.84707	8.81344	3.40734	5.40611	4.85128e-23	1.07057e-21
chrII	375126	376412	chrII:375126-376412	chrII	375690	375691	YBR068C	1	-	chrII	375126	376412	1287	*	9.43461	9.74649	9.03616	0.710329	0.0110673	0.0258237
chrII	378251	378980	chrII:378251-378980	chrII	378433	378434	YBR069C	1	-	chrII	378251	378980	730	*	8.18385	8.51245	7.75763	0.754816	0.0138208	0.0311326
chrII	408620	409521	chrII:408620-409521	chrII	409167	409168	YBR083W	1	+	chrII	408620	409521	902	*	8.59959	8.99422	8.05459	0.939629	0.001107	0.00354132
chrII	418907	419491	chrII:418907-419491	chrII	419164	419165	YBR085C-A	1	-	chrII	418907	419491	585	*	7.70013	8.46448	5.96988	2.49459	0.0005788	0.00200959
chrII	426508	427006	chrII:426508-427006	chrII	426489	426490	YBR089C-A	1	-	chrII	426508	427006	499	*	7.54307	8.05985	6.73019	1.32966	0.000234779	0.000931957
chrII	447481	447647	chrII:447481-447647	chrII	447707	447708	YBR103W	1	+	chrII	447481	447647	167	*	6.26246	7.25177	0.181105	7.07066	3.33184e-32	9.8592e-31
chrII	451953	452482	chrII:451953-452482	chrII	451969	451970	YBR105C	1	-	chrII	451953	452482	530	*	7.7844	8.18077	7.23606	0.944709	0.00176419	0.00529256
chrII	473884	474131	chrII:473884-474131	chrII	473926	473927	YBR115C	1	-	chrII	473884	474131	248	*	6.53458	7.30205	4.78656	2.5155	5.57061e-12	7.32619e-11
chrII	489814	490994	chrII:489814-490994	chrII	490392	490393	YBR126C	1	-	chrII	489814	490994	1181	*	8.84125	9.82258	3.56003	6.26255	8.76968e-26	2.11447e-24
chrII	501488	501666	chrII:501488-501666	chrII	501442	501443	YBR132C	1	-	chrII	501488	501666	179	*	6.47104	7.42249	2.55381	4.86868	3.53265e-24	8.06931e-23
chrII	544605	545041	chrII:544605-545041	chrII	545026	545027	YBR151W	1	+	chrII	544605	545041	437	*	7.45195	7.93501	6.7205	1.21452	0.000172563	0.00072012
chrII	554067	556266	chrII:554067-556266	chrII	554310	554311	YBR157C	1	-	chrII	554067	556266	2200	*	9.48532	9.73508	9.18308	0.551998	0.0428636	0.0825092
chrII	578146	578250	chrII:578146-578250	chrII	578086	578087	YBR170C	1	-	chrII	578146	578250	105	*	6.26897	6.81448	5.38122	1.43327	0.000271586	0.00104617
chrII	586266	586286	chrII:586266-586286	chrII	586162	586163	YBR177C	1	-	chrII	586266	586286	21	*	5.68151	6.00104	5.27047	0.730572	0.036499	0.0716767
chrII	602152	602383	chrII:602152-602383	chrII	602632	602633	YBR187W	1	+	chrII	602152	602383	232	*	6.90052	7.34662	6.25137	1.09525	0.00305452	0.00847971
chrII	604206	604420	chrII:604206-604420	chrII	604506	604507	YBR189W	1	+	chrII	604206	604420	215	*	7.11757	7.47257	6.64567	0.826903	0.00829987	0.0201989
chrII	760819	761091	chrII:760819-761091	chrII	761255	761256	YBR279W	1	+	chrII	760819	761091	273	*	6.92982	7.30657	6.41851	0.888063	0.0115288	0.0266143
chrII	774566	775490	chrII:774566-775490	chrII	774698	774699	YBR286W	1	+	chrII	774566	775490	925	*	8.91621	9.91452	0.181105	9.73341	1.01091e-68	1.09683e-66
chrIII	50306	52056	chrIII:50306-52056	chrIII	50582	50583	YCL042W	1	+	chrIII	50306	52056	1751	*	10.1691	11.0356	7.66816	3.36748	5.26209e-20	1.00754e-18
chrIII	52386	52605	chrIII:52386-52605	chrIII	52643	52644	YCL039W	1	+	chrIII	52386	52605	220	*	6.71943	7.20725	5.97688	1.23037	0.000165093	0.000693389
chrIII	95836	96090	chrIII:95836-96090	chrIII	95763	95764	YCL016C	1	-	chrIII	95836	96090	255	*	7.02192	7.72605	5.59075	2.1353	1.64824e-09	1.71681e-08
chrIII	119772	120750	chrIII:119772-120750	chrIII	120318	120319	YCR004C	1	-	chrIII	119772	120750	979	*	8.64227	9.32853	7.28713	2.0414	1.75538e-10	2.04063e-09
chrIII	121535	124013	chrIII:121535-124013	chrIII	122328	122329	YCR005C	1	-	chrIII	121535	124013	2479	*	10.1445	10.7161	9.18379	1.53228	2.71476e-06	1.80338e-05
chrIII	157373	157890	chrIII:157373-157890	chrIII	157765	157766	YCR022C	1	-	chrIII	157373	157890	518	*	7.47225	7.8155	7.02097	0.794529	0.0202255	0.0430289
chrIII	236483	236830	chrIII:236483-236830	chrIII	236322	236323	YCR067C	1	-	chrIII	236483	236830	348	*	6.74143	7.19386	6.07863	1.11522	0.00053379	0.00186326
chrIII	246767	246862	chrIII:246767-246862	chrIII	246961	246962	YCR073W-A	1	+	chrIII	246767	246862	96	*	5.89374	6.25206	5.41594	0.836122	0.0213092	0.0450399
chrIII	262628	262920	chrIII:262628-262920	chrIII	262914	262915	YCR085W	1	+	chrIII	262628	262920	293	*	7.15756	7.52697	6.65974	0.86723	0.00869393	0.020962
chrIV	61032	62188	chrIV:61032-62188	chrIV	61801	61802	YDL222C	1	-	chrIV	61032	62188	1157	*	8.71831	9.71637	0.181105	9.53526	1.28427e-56	5.76594e-55
chrIV	76319	77055	chrIV:76319-77055	chrIV	76545	76546	YDL214C	1	-	chrIV	76319	77055	737	*	7.46789	8.46326	0.181105	8.28216	9.07158e-48	3.19222e-46
chrIV	93791	94314	chrIV:93791-94314	chrIV	93745	93746	YDL205C	1	-	chrIV	93791	94314	524	*	7.17691	8.14432	2.69244	5.45188	1.40684e-28	3.5225e-27
chrIV	135485	135841	chrIV:135485-135841	chrIV	135894	135895	YDL180W	1	+	chrIV	135485	135841	357	*	7.15371	7.80155	5.94672	1.85483	2.48312e-05	0.000135273
chrIV	147244	148106	chrIV:147244-148106	chrIV	147589	147590	YDL174C	1	-	chrIV	147244	148106	863	*	8.24661	9.24391	0.181105	9.06281	6.0909e-52	2.40314e-50
chrIV	199801	199933	chrIV:199801-199933	chrIV	199994	199995	YDL143W	1	+	chrIV	199801	199933	133	*	5.96154	6.90338	2.29989	4.60349	3.98388e-21	8.10471e-20
chrIV	210680	210992	chrIV:210680-210992	chrIV	210561	210562	YDL140C	1	-	chrIV	210680	210992	313	*	7.57425	8.1827	6.50142	1.68128	3.15942e-07	2.44855e-06
chrIV	229296	229880	chrIV:229296-229880	chrIV	229904	229905	YDL130W	1	+	chrIV	229296	229880	585	*	7.47951	7.93652	6.80676	1.12976	0.000652717	0.00222753
chrIV	230700	230993	chrIV:230700-230993	chrIV	231022	231023	YDL129W	1	+	chrIV	230700	230993	294	*	7.43255	7.79875	6.94057	0.858179	0.00402728	0.010767
chrIV	239234	240225	chrIV:239234-240225	chrIV	239606	239607	YDL125C	1	-	chrIV	239234	240225	992	*	7.93634	8.49182	7.02134	1.47047	2.31205e-06	1.55487e-05
chrIV	264227	265085	chrIV:264227-265085	chrIV	264964	264965	YDL110C	1	-	chrIV	264227	265085	859	*	8.40573	9.05837	7.18127	1.8771	9.20475e-10	9.90461e-09
chrIV	314338	315071	chrIV:314338-315071	chrIV	314748	314749	YDL079C	1	-	chrIV	314338	315071	734	*	7.73344	8.72959	0.181105	8.54848	4.13875e-48	1.49685e-46
chrIV	330598	331408	chrIV:330598-331408	chrIV	331022	331023	YDL070W	1	+	chrIV	330598	331408	811	*	8.84586	9.33638	8.09694	1.23944	0.000118206	0.000525269
chrIV	372278	372290	chrIV:372278-372290	chrIV	372246	372247	YDL045W-A	1	+	chrIV	372278	372290	13	*	4.35524	4.98542	3.21041	1.77501	0.00229682	0.00664546
chrIV	447526	447854	chrIV:447526-447854	chrIV	447578	447579	YDL002C	1	-	chrIV	447526	447854	329	*	7.40869	7.77063	6.92438	0.846251	0.00659578	0.0165148
chrIV	452148	453167	chrIV:452148-453167	chrIV	452475	452476	YDR001C	1	-	chrIV	452148	453167	1020	*	8.70344	9.54994	6.39492	3.15503	1.41798e-16	2.49488e-15
chrIV	454512	455203	chrIV:454512-455203	chrIV	454780	454781	YDR003W-A	1	+	chrIV	454512	455203	692	*	8.33063	8.65962	7.90373	0.755888	0.00748516	0.0183881
chrIV	482239	482652	chrIV:482239-482652	chrIV	482267	482268	YDR017C	1	-	chrIV	482239	482652	414	*	7.45019	7.99113	6.5747	1.41643	0.000999274	0.00324452
chrIV	538639	539896	chrIV:538639-539896	chrIV	539801	539802	YDR041W	1	+	chrIV	538639	539896	1258	*	7.9611	8.68541	6.43779	2.24762	5.4862e-13	8.11708e-12
chrIV	543211	544234	chrIV:543211-544234	chrIV	543369	543370	YDR043C	1	-	chrIV	543211	544234	1024	*	8.59851	9.00892	8.02275	0.986169	0.00130867	0.00406823
chrIV	583620	583659	chrIV:583620-583659	chrIV	583711	583712	YDR068W	1	+	chrIV	583620	583659	40	*	5.68956	6.5623	3.12344	3.43885	2.41944e-12	3.35119e-11
chrIV	588148	588456	chrIV:588148-588456	chrIV	588379	588380	YDR070C	1	-	chrIV	588148	588456	309	*	6.91381	7.90701	0.181105	7.72591	1.14855e-40	3.73853e-39
chrIV	588948	589630	chrIV:588948-589630	chrIV	589402	589403	YDR071C	1	-	chrIV	588948	589630	683	*	7.87326	8.55818	6.52361	2.03457	1.45797e-09	1.53086e-08
chrIV	593087	594425	chrIV:593087-594425	chrIV	593891	593892	YDR074W	1	+	chrIV	593087	594425	1339	*	9.21874	10.1921	4.44369	5.74846	1.81749e-16	3.15517e-15
chrIV	599486	602166	chrIV:599486-602166	chrIV	600791	600792	YDR077W	1	+	chrIV	599486	602166	2681	*	10.6891	11.1028	10.1068	0.996004	0.00061105	0.00209917
chrIV	636302	637247	chrIV:636302-637247	chrIV	636527	636528	YDR095C	1	-	chrIV	636302	637247	946	*	8.1155	9.01135	5.27173	3.73962	6.19109e-25	1.43943e-23
chrIV	652479	653323	chrIV:652479-653323	chrIV	653605	653606	YDR099W	1	+	chrIV	652479	653323	845	*	8.58227	9.19896	7.4827	1.71625	2.00139e-08	1.80959e-07
chrIV	657599	658279	chrIV:657599-658279	chrIV	657980	657981	YDR102C	1	-	chrIV	657599	658279	681	*	8.29935	8.85242	7.39099	1.46143	3.66653e-07	2.80813e-06
chrIV	715373	715531	chrIV:715373-715531	chrIV	715379	715380	YDR129C	1	-	chrIV	715373	715531	159	*	6.42412	6.95469	5.57598	1.3787	4.76679e-05	0.000239628
chrIV	767872	769373	chrIV:767872-769373	chrIV	767971	767972	YDR153C	1	-	chrIV	767872	769373	1502	*	9.33086	9.71454	8.80665	0.907889	0.000946773	0.00311675
chrIV	794141	794360	chrIV:794141-794360	chrIV	793889	793890	YDR169C	1	-	chrIV	794141	794360	220	*	6.59985	7.22682	5.46596	1.76086	8.50261e-07	6.18458e-06
chrIV	806248	807152	chrIV:806248-807152	chrIV	806619	806620	YDR171W	1	+	chrIV	806248	807152	905	*	8.78744	9.78559	0.181105	9.60449	1.89447e-63	1.45094e-61
chrIV	812013	812164	chrIV:812013-812164	chrIV	812108	812109	YDR174W	1	+	chrIV	812013	812164	152	*	6.25666	6.67179	5.67152	1.00027	0.0181745	0.0391126
chrIV	831507	831678	chrIV:831507-831678	chrIV	831513	831514	YDR184C	1	-	chrIV	831507	831678	172	*	6.7054	7.14625	6.06739	1.07886	0.00220769	0.0064739
chrIV	892512	893077	chrIV:892512-893077	chrIV	892873	892874	YDR214W	1	+	chrIV	892512	893077	566	*	7.95929	8.44609	7.21912	1.22697	0.000105427	0.000483331
chrIV	893941	894892	chrIV:893941-894892	chrIV	894502	894503	YDR215C	1	-	chrIV	893941	894892	952	*	8.35516	8.87946	7.52321	1.35625	2.97558e-06	1.9371e-05
chrIV	915736	916902	chrIV:915736-916902	chrIV	916484	916485	YDR226W	1	+	chrIV	915736	916902	1167	*	9.06847	9.47621	8.49798	0.978236	0.000384454	0.00140949
chrIV	927044	927554	chrIV:927044-927554	chrIV	927450	927451	YDR232W	1	+	chrIV	927044	927554	511	*	7.82909	8.60303	6.04353	2.5595	1.76043e-09	1.81911e-08
chrIV	950427	950647	chrIV:950427-950647	chrIV	950561	950562	YDR244W	1	+	chrIV	950427	950647	221	*	6.67363	7.40584	5.11219	2.29365	0.000145973	0.000631009
chrIV	954825	956193	chrIV:954825-956193	chrIV	955131	955132	YDR246W-A	1	+	chrIV	954825	956193	1369	*	8.66327	9.34864	7.31177	2.03687	3.24773e-08	2.83795e-07
chrIV	973820	974410	chrIV:973820-974410	chrIV	974243	974244	YDR258C	1	-	chrIV	973820	974410	591	*	8.04207	9.03897	0.181105	8.85786	1.33902e-56	5.81137e-55
chrIV	1005331	1005722	chrIV:1005331-1005722	chrIV	1005673	1005674	YDR270W	1	+	chrIV	1005331	1005722	392	*	7.47054	8.02758	6.55121	1.47638	1.7397e-05	9.63866e-05
chrIV	1015124	1016335	chrIV:1015124-1016335	chrIV	1015702	1015703	YDR277C	1	-	chrIV	1015124	1016335	1212	*	9.01883	10.0106	2.55381	7.45683	4.48427e-56	1.88339e-54
chrIV	1124927	1125216	chrIV:1124927-1125216	chrIV	1124925	1124926	YDR326C	1	-	chrIV	1124927	1125216	290	*	6.90524	7.41448	6.11114	1.30334	0.000144343	0.000628546
chrIV	1135481	1135638	chrIV:1135481-1135638	chrIV	1135431	1135432	YDR333C	1	-	chrIV	1135481	1135638	158	*	6.41616	6.89505	5.69433	1.20072	0.00210189	0.00619153
chrIV	1153586	1154307	chrIV:1153586-1154307	chrIV	1153626	1153627	YDR341C	1	-	chrIV	1153586	1154307	722	*	8.14903	8.94992	6.1935	2.75642	6.93613e-18	1.25428e-16
chrIV	1155512	1157889	chrIV:1155512-1157889	chrIV	1155928	1155929	YDR342C	1	-	chrIV	1155512	1157889	2378	*	9.07309	9.75348	7.74187	2.01162	6.26816e-11	7.62724e-10
chrIV	1160945	1161853	chrIV:1160945-1161853	chrIV	1161320	1161321	YDR343C	1	-	chrIV	1160945	1161853	909	*	7.42993	8.41377	1.94156	6.47221	6.23459e-41	2.0814e-39
chrIV	1174159	1174457	chrIV:1174159-1174457	chrIV	1174176	1174177	YDR349C	1	-	chrIV	1174159	1174457	299	*	6.88723	7.62195	5.31346	2.30849	9.75999e-09	9.41297e-08
chrIV	1233610	1234482	chrIV:1233610-1234482	chrIV	1234216	1234217	YDR380W	1	+	chrIV	1233610	1234482	873	*	8.23247	9.1189	5.50894	3.60996	0.000150275	0.000641502
chrIV	1236156	1237753	chrIV:1236156-1237753	chrIV	1236556	1236557	YDR381W	1	+	chrIV	1236156	1237753	1598	*	10.4013	10.764	9.91561	0.848383	0.00222512	0.00650679
chrIV	1251880	1252098	chrIV:1251880-1252098	chrIV	1252535	1252536	YDR389W	1	+	chrIV	1251880	1252098	219	*	6.64921	7.25985	5.56931	1.69053	1.30312e-06	9.12186e-06
chrIV	1266797	1267175	chrIV:1266797-1267175	chrIV	1266898	1266899	YDR397C	1	-	chrIV	1266797	1267175	379	*	7.1935	7.65004	6.52175	1.12829	0.000186838	0.000767393
chrIV	1359644	1360335	chrIV:1359644-1360335	chrIV	1359921	1359922	YDR450W	1	+	chrIV	1359644	1360335	692	*	8.26217	8.58451	7.84644	0.738069	0.0119233	0.0273794
chrIV	1362165	1362827	chrIV:1362165-1362827	chrIV	1362181	1362182	YDR451C	1	-	chrIV	1362165	1362827	663	*	7.76394	8.05423	7.40013	0.654105	0.0225552	0.046912
chrIV	1383254	1383619	chrIV:1383254-1383619	chrIV	1383443	1383444	YDR459C	1	-	chrIV	1383254	1383619	366	*	6.6683	7.66024	0.181105	7.47913	1.34544e-30	3.72714e-29
chrIV	1398765	1398930	chrIV:1398765-1398930	chrIV	1398700	1398701	YDR468C	1	-	chrIV	1398765	1398930	166	*	6.63069	7.30805	5.31162	1.99643	1.72636e-08	1.57183e-07
chrIV	1444828	1445529	chrIV:1444828-1445529	chrIV	1445467	1445468	YDR497C	1	-	chrIV	1444828	1445529	702	*	8.57433	9.57219	0.181105	9.39108	6.265e-59	3.39876e-57
chrIV	1476678	1476945	chrIV:1476678-1476945	chrIV	1476476	1476477	YDR516C	1	-	chrIV	1476678	1476945	268	*	6.61528	7.02009	6.05055	0.969541	0.0140314	0.0315524
chrIX	21752	23386	chrIX:21752-23386	chrIX	19845	19846	YIL170W	1	+	chrIX	21752	23386	1635	*	9.47527	9.87156	8.92709	0.944465	0.000530728	0.00185755
chrIX	36206	37360	chrIX:36206-37360	chrIX	37252	37253	YIL163C	1	-	chrIX	36206	37360	1155	*	7.69569	8.69174	0.181105	8.51064	1.15935e-51	4.43963e-50
chrIX	46031	46253	chrIX:46031-46253	chrIX	46199	46200	YIL158W	1	+	chrIX	46031	46253	223	*	6.91946	7.22095	6.53787	0.68308	0.0240648	0.0495765
chrIX	53245	54060	chrIX:53245-54060	chrIX	53708	53709	YIL155C	1	-	chrIX	53245	54060	816	*	8.2129	9.21014	0.181105	9.02903	1.44631e-58	7.53238e-57
chrIX	93611	94441	chrIX:93611-94441	chrIX	93617	93618	YIL136W	1	+	chrIX	93611	94441	831	*	9.03974	10.0382	0.181105	9.85708	1.58909e-66	1.47785e-64
chrIX	102318	102702	chrIX:102318-102702	chrIX	102780	102781	YIL130W	1	+	chrIX	102318	102702	385	*	7.81136	8.24128	7.19617	1.04511	0.000355307	0.00131798
chrIX	125762	126162	chrIX:125762-126162	chrIX	126202	126203	YIL124W	1	+	chrIX	125762	126162	401	*	7.10167	7.67465	6.13704	1.53761	1.89461e-05	0.000104345
chrIX	154938	155351	chrIX:154938-155351	chrIX	155220	155221	YIL111W	1	+	chrIX	154938	155351	414	*	7.55226	8.07946	6.71284	1.36663	0.000596153	0.00205341
chrIX	165870	166293	chrIX:165870-166293	chrIX	165761	165762	YIL107C	1	-	chrIX	165870	166293	424	*	7.43835	7.76224	7.02003	0.742214	0.0458035	0.0869331
chrIX	322037	322305	chrIX:322037-322305	chrIX	322340	322341	YIL015W	1	+	chrIX	322037	322305	269	*	7.35499	7.8109	6.68463	1.12627	0.000305672	0.00115693
chrIX	382198	383038	chrIX:382198-383038	chrIX	382626	382627	YIR016W	1	+	chrIX	382198	383038	841	*	8.12483	8.77872	6.89576	1.88296	3.01803e-07	2.35298e-06
chrV	16197	16766	chrV:16197-16766	chrV	16353	16354	YEL071W	1	+	chrV	16197	16766	570	*	8.02198	8.87572	5.64737	3.22834	1.19351e-05	6.96841e-05
chrV	41714	42316	chrV:41714-42316	chrV	41953	41954	YEL060C	1	-	chrV	41714	42316	603	*	8.24184	8.90174	6.99038	1.91136	1.36153e-09	1.44123e-08
chrV	80172	80314	chrV:80172-80314	chrV	80460	80461	YEL038W	1	+	chrV	80172	80314	143	*	6.37817	6.74123	5.89186	0.849368	0.0169299	0.036738
chrV	132859	133787	chrV:132859-133787	chrV	133118	133119	YEL011W	1	+	chrV	132859	133787	929	*	8.72386	9.72192	0.181105	9.54082	2.56668e-63	1.85656e-61
chrV	192003	192818	chrV:192003-192818	chrV	192624	192625	YER018C	1	-	chrV	192003	192818	816	*	8.39784	8.73934	7.94959	0.789757	0.0113692	0.0262926
chrV	194484	195366	chrV:194484-195366	chrV	194539	194540	YER019C-A	1	-	chrV	194484	195366	883	*	7.95827	8.88678	4.58771	4.29908	1.27316e-30	3.6036e-29
chrV	221383	221791	chrV:221383-221791	chrV	221844	221845	YER034W	1	+	chrV	221383	221791	409	*	7.59397	8.04464	6.935	1.10964	0.000745311	0.00250748
chrV	222330	223176	chrV:222330-223176	chrV	222637	222638	YER035W	1	+	chrV	222330	223176	847	*	8.28442	8.63224	7.82518	0.80706	0.00882854	0.021169
chrV	259488	260134	chrV:259488-260134	chrV	259639	259640	YER053C	1	-	chrV	259488	260134	647	*	7.34344	8.32627	1.94156	6.38471	9.05674e-37	2.80759e-35
chrV	264109	265121	chrV:264109-265121	chrV	263698	263699	YER054C	1	-	chrV	264109	265121	1013	*	7.80234	8.55692	6.12589	2.43103	0.0162981	0.0357843
chrV	280316	281794	chrV:280316-281794	chrV	280682	280683	YER062C	1	-	chrV	280316	281794	1479	*	8.793	9.45266	7.54246	1.9102	5.33053e-10	5.93192e-09
chrV	283584	285154	chrV:283584-285154	chrV	284222	284223	YER064C	1	-	chrV	283584	285154	1571	*	9.18237	9.51733	8.74534	0.771993	0.00753023	0.018464
chrV	292344	292788	chrV:292344-292788	chrV	292563	292564	YER067C-A	1	-	chrV	292344	292788	445	*	7.47497	8.38859	4.37004	4.01854	1.29828e-07	1.05648e-06
chrV	319124	319804	chrV:319124-319804	chrV	319961	319962	YER080W	1	+	chrV	319124	319804	681	*	8.16479	9.16194	0.181105	8.98083	5.21605e-58	2.5153e-56
chrV	432889	433322	chrV:432889-433322	chrV	432493	432494	YER133W	1	+	chrV	432889	433322	434	*	8.00448	8.31615	7.60637	0.709783	0.0385729	0.0755216
chrV	484311	484571	chrV:484311-484571	chrV	484341	484342	YER156C	1	-	chrV	484311	484571	261	*	6.92784	7.63201	5.49656	2.13545	0.000653545	0.00222753
chrV	503847	503985	chrV:503847-503985	chrV	503782	503783	YER163C	1	-	chrV	503847	503985	139	*	6.1694	6.51901	5.70701	0.812009	0.0189651	0.0404133
chrVI	54186	55260	chrVI:54186-55260	chrVI	54696	54697	YFL039C	1	-	chrVI	54186	55260	1075	*	8.97627	9.28011	8.59088	0.689235	0.0127101	0.0289887
chrVI	95095	96384	chrVI:95095-96384	chrVI	95964	95965	YFL021W	1	+	chrVI	95095	96384	1290	*	8.50263	8.95314	7.844	1.10914	0.000114466	0.000510394
chrVI	105849	107852	chrVI:105849-107852	chrVI	106236	106237	YFL016C	1	-	chrVI	105849	107852	2004	*	9.30488	10.2542	5.44873	4.80546	7.34556e-08	6.21033e-07
chrVI	155731	156525	chrVI:155731-156525	chrVI	155873	155874	YFR005C	1	-	chrVI	155731	156525	795	*	8.23862	8.85533	7.13894	1.71638	1.38279e-08	1.26788e-07
chrVI	176289	176829	chrVI:176289-176829	chrVI	176391	176392	YFR015C	1	-	chrVI	176289	176829	541	*	7.55008	8.38558	5.336	3.04958	1.01733e-13	1.57686e-12
chrVI	233598	233823	chrVI:233598-233823	chrVI	233544	233545	YFR039C	1	-	chrVI	233598	233823	226	*	6.6586	7.21396	5.74392	1.47005	0.00131154	0.00406823
chrVI	254263	256138	chrVI:254263-256138	chrVI	255049	255050	YFR053C	1	-	chrVI	254263	256138	1876	*	8.97915	9.97753	0.181105	9.79643	6.97815e-71	1.13569e-68
chrVII	167240	167664	chrVII:167240-167664	chrVII	167350	167351	YGL178W	1	+	chrVII	167240	167664	425	*	7.69933	8.22289	6.86928	1.35361	4.34584e-06	2.73347e-05
chrVII	196604	196698	chrVII:196604-196698	chrVII	196403	196404	YGL163C	1	-	chrVII	196604	196698	95	*	6.29292	6.79957	5.50518	1.29438	0.00285013	0.00798994
chrVII	197208	198341	chrVII:197208-198341	chrVII	198136	198137	YGL162W	1	+	chrVII	197208	198341	1134	*	8.21203	8.97583	6.48489	2.49094	5.15706e-15	8.2895e-14
chrVII	213620	214137	chrVII:213620-214137	chrVII	214079	214080	YGL155W	1	+	chrVII	213620	214137	518	*	7.207	8.15081	3.49656	4.65425	1.71745e-29	4.47223e-28
chrVII	228509	228709	chrVII:228509-228709	chrVII	228329	228330	YGL147C	1	-	chrVII	228509	228709	201	*	7.07922	7.37689	6.70373	0.673156	0.0346427	0.0687574
chrVII	229644	230235	chrVII:229644-230235	chrVII	229686	229687	YGL146C	1	-	chrVII	229644	230235	592	*	7.26323	7.94005	5.94632	1.99372	2.54922e-10	2.91148e-09
chrVII	253896	254640	chrVII:253896-254640	chrVII	254639	254640	YGL135W	1	+	chrVII	253896	254640	745	*	8.27616	8.72318	7.62504	1.09814	0.000468401	0.00166628
chrVII	257345	257387	chrVII:257345-257387	chrVII	257705	257706	YGL133W	1	+	chrVII	257345	257387	43	*	5.67811	6.07559	5.12764	0.947949	0.0128339	0.0291619
chrVII	284067	284115	chrVII:284067-284115	chrVII	283937	283938	YGL120C	1	-	chrVII	284067	284115	49	*	5.96369	6.30151	5.52175	0.779763	0.0266983	0.0543144
chrVII	384375	385746	chrVII:384375-385746	chrVII	384651	384652	YGL063C-A	1	-	chrVII	384375	385746	1372	*	9.06846	9.90724	6.8269	3.08034	2.67512e-19	4.97573e-18
chrVII	426830	428656	chrVII:426830-428656	chrVII	427947	427948	YGL037C	1	-	chrVII	426830	428656	1827	*	9.62612	10.2428	8.52653	1.71628	1.43394e-07	1.15962e-06
chrVII	432736	433972	chrVII:432736-433972	chrVII	433062	433063	YGL035C	1	-	chrVII	432736	433972	1237	*	8.47344	9.05884	7.47216	1.58668	3.90162e-05	0.000203579
chrVII	465692	465860	chrVII:465692-465860	chrVII	465435	465436	YGL015C	1	-	chrVII	465692	465860	169	*	6.53884	7.15777	5.43186	1.72591	1.50296e-06	1.04088e-05
chrVII	472334	472838	chrVII:472334-472838	chrVII	472853	472854	YGL012W	1	+	chrVII	472334	472838	505	*	7.75786	8.26976	6.95717	1.31259	7.46605e-06	4.47963e-05
chrVII	485325	486033	chrVII:485325-486033	chrVII	485421	485422	YGL006W-A	1	+	chrVII	485325	486033	709	*	8.18697	8.84026	6.96011	1.88015	1.60871e-07	1.29293e-06
chrVII	508243	508553	chrVII:508243-508553	chrVII	508364	508365	YGR008C	1	-	chrVII	508243	508553	311	*	7.00055	7.92902	3.63072	4.29831	1.38694e-12	1.96593e-11
chrVII	526749	526957	chrVII:526749-526957	chrVII	527329	527330	YGR020C	1	-	chrVII	526749	526957	209	*	6.96842	7.40848	6.33206	1.07642	0.00116477	0.00370791
chrVII	589382	589807	chrVII:589382-589807	chrVII	589469	589470	YGR047C	1	-	chrVII	589382	589807	426	*	7.44051	8.01633	6.46761	1.54872	4.25084e-06	2.6867e-05
chrVII	640276	640616	chrVII:640276-640616	chrVII	640371	640372	YGR078C	1	-	chrVII	640276	640616	341	*	7.4358	7.81131	6.92679	0.884514	0.00588525	0.0148502
chrVII	649649	651265	chrVII:649649-651265	chrVII	650617	650618	YGR086C	1	-	chrVII	649649	651265	1617	*	9.88141	10.5669	8.5295	2.03737	1.1926e-10	1.42455e-09
chrVII	742154	742230	chrVII:742154-742230	chrVII	742323	742324	YGR125W	1	+	chrVII	742154	742230	77	*	5.92676	6.7352	3.91915	2.81605	4.27518e-12	5.73844e-11
chrVII	753074	754120	chrVII:753074-754120	chrVII	753844	753845	YGR130C	1	-	chrVII	753074	754120	1047	*	8.56324	9.56108	0.181105	9.37997	5.59705e-63	3.83545e-61
chrVII	756545	756844	chrVII:756545-756844	chrVII	756894	756895	YGR133W	1	+	chrVII	756545	756844	300	*	6.80213	7.31709	5.99383	1.32325	0.0166742	0.0363649
chrVII	762307	762675	chrVII:762307-762675	chrVII	762426	762427	YGR136W	1	+	chrVII	762307	762675	369	*	7.60163	8.26091	6.35252	1.90838	2.99899e-09	3.05054e-08
chrVII	809338	809965	chrVII:809338-809965	chrVII	809420	809421	YGR161C	1	-	chrVII	809338	809965	628	*	7.74541	8.32136	6.77211	1.54925	7.7193e-07	5.71053e-06
chrVII	810701	810909	chrVII:810701-810909	chrVII	810225	810226	YGR161W-C	1	+	chrVII	810701	810909	209	*	6.42845	6.97802	5.5297	1.44832	3.91245e-05	0.000203579
chrVII	836496	837156	chrVII:836496-837156	chrVII	836665	836666	YGR169C-A	1	-	chrVII	836496	837156	661	*	8.1714	8.67182	7.39883	1.27299	9.39144e-06	5.55803e-05
chrVII	848288	848875	chrVII:848288-848875	chrVII	848423	848424	YGR175C	1	-	chrVII	848288	848875	588	*	8.15328	8.51914	7.66191	0.85723	0.00350948	0.00961966
chrVII	880056	880334	chrVII:880056-880334	chrVII	880418	880419	YGR191W	1	+	chrVII	880056	880334	279	*	7.12848	7.75973	5.97998	1.77975	7.37316e-07	5.51716e-06
chrVII	905057	906453	chrVII:905057-906453	chrVII	905235	905236	YGR203W	1	+	chrVII	905057	906453	1397	*	8.92118	9.38336	8.23703	1.14633	0.000110828	0.00050253
chrVII	911668	911860	chrVII:911668-911860	chrVII	911881	911882	YGR208W	1	+	chrVII	911668	911860	193	*	6.93499	7.60699	5.63711	1.96988	2.87813e-08	2.5492e-07
chrVII	914899	915078	chrVII:914899-915078	chrVII	914738	914739	YGR210C	1	-	chrVII	914899	915078	180	*	6.91686	7.33861	6.31836	1.02025	0.00198892	0.0058988
chrVII	950918	951663	chrVII:950918-951663	chrVII	950899	950900	YGR229C	1	-	chrVII	950918	951663	746	*	8.1345	8.60697	7.42733	1.17964	0.000194913	0.000793051
chrVII	973417	974699	chrVII:973417-974699	chrVII	973734	973735	YGR240C	1	-	chrVII	973417	974699	1283	*	9.06229	9.40799	8.60674	0.801249	0.0057367	0.0145598
chrVII	976460	977958	chrVII:976460-977958	chrVII	976581	976582	YGR241C	1	-	chrVII	976460	977958	1499	*	9.15333	10.0445	6.37063	3.67387	1.2975e-29	3.44764e-28
chrVII	999993	1001559	chrVII:999993-1001559	chrVII	1000925	1000926	YGR254W	1	+	chrVII	999993	1001559	1567	*	9.11802	9.62842	8.32104	1.30738	7.25497e-06	4.39347e-05
chrVII	1012251	1012610	chrVII:1012251-1012610	chrVII	1012483	1012484	YGR260W	1	+	chrVII	1012251	1012610	360	*	7.35827	8.14345	5.50465	2.6388	2.14606e-15	3.58227e-14
chrVII	1022201	1022516	chrVII:1022201-1022516	chrVII	1022654	1022655	YGR266W	1	+	chrVII	1022201	1022516	316	*	7.09512	7.41988	6.67535	0.744526	0.0186757	0.0399273
chrVII	1038364	1038392	chrVII:1038364-1038392	chrVII	1038501	1038502	YGR271C-A	1	-	chrVII	1038364	1038392	29	*	5.48884	6.47052	0.181105	6.28941	8.86921e-24	1.99098e-22
chrVII	1052250	1052573	chrVII:1052250-1052573	chrVII	1052822	1052823	YGR281W	1	+	chrVII	1052250	1052573	324	*	7.42722	7.68977	7.10601	0.583769	0.0479267	0.0904357
chrVIII	54449	56182	chrVIII:54449-56182	chrVIII	54849	54850	YHL025W	1	+	chrVIII	54449	56182	1734	*	9.03701	9.35336	8.63121	0.722153	0.0124846	0.0285676
chrVIII	65175	66264	chrVIII:65175-66264	chrVIII	65859	65860	YHL021C	1	-	chrVIII	65175	66264	1090	*	9.20093	10.1995	0.181105	10.0184	4.09665e-70	4.84895e-68
chrVIII	108345	108834	chrVIII:108345-108834	chrVIII	108810	108811	YHR002W	1	+	chrVIII	108345	108834	490	*	7.76139	8.15811	7.21239	0.945719	0.0210987	0.0447102
chrVIII	123556	123799	chrVIII:123556-123799	chrVIII	123590	123591	YHR008C	1	-	chrVIII	123556	123799	244	*	6.71224	7.39519	5.37063	2.02455	8.53553e-08	7.16985e-07
chrVIII	173066	173202	chrVIII:173066-173202	chrVIII	172970	172971	YHR031C	1	-	chrVIII	173066	173202	137	*	6.9539	7.38775	6.33055	1.05721	0.000969458	0.00316349
chrVIII	175316	175724	chrVIII:175316-175724	chrVIII	175394	175395	YHR032C-A	1	-	chrVIII	175316	175724	409	*	7.64057	8.35122	6.18043	2.17079	1.66425e-10	1.95212e-09
chrVIII	207364	207413	chrVIII:207364-207413	chrVIII	207530	207531	YHR049C-A	1	-	chrVIII	207364	207413	50	*	5.75542	6.28861	4.90047	1.38814	0.000106061	0.000484533
chrVIII	255940	256290	chrVIII:255940-256290	chrVIII	256358	256359	YHR078W	1	+	chrVIII	255940	256290	351	*	7.35361	7.86651	6.55043	1.31609	4.29938e-05	0.000220385
chrVIII	271840	272476	chrVIII:271840-272476	chrVIII	272625	272626	YHR083W	1	+	chrVIII	271840	272476	637	*	8.18558	8.82897	6.9946	1.83438	8.16327e-10	8.93158e-09
chrVIII	277863	277972	chrVIII:277863-277972	chrVIII	278151	278152	YHR086W	1	+	chrVIII	277863	277972	110	*	6.54268	7.01412	5.83782	1.1763	0.000669823	0.00226522
chrVIII	375328	376179	chrVIII:375328-376179	chrVIII	375707	375708	YHR137W	1	+	chrVIII	375328	376179	852	*	8.56868	9.52305	4.56313	4.95992	3.40251e-09	3.43417e-08
chrVIII	396849	397239	chrVIII:396849-397239	chrVIII	397249	397250	YHR150W	1	+	chrVIII	396849	397239	391	*	7.55186	7.90384	7.0853	0.81854	0.0183072	0.0392039
chrVIII	401110	401371	chrVIII:401110-401371	chrVIII	401432	401433	YHR152W	1	+	chrVIII	401110	401371	262	*	7.02662	7.34462	6.6181	0.726524	0.0168382	0.0365999
chrVIII	422758	423721	chrVIII:422758-423721	chrVIII	423070	423071	YHR162W	1	+	chrVIII	422758	423721	964	*	8.84426	9.30295	8.16784	1.13511	4.92159e-05	0.000245514
chrVIII	508907	508920	chrVIII:508907-508920	chrVIII	509361	509362	YHR205W	1	+	chrVIII	508907	508920	14	*	5.69848	6.22929	4.84973	1.37956	0.000113898	0.000509608
chrVIII	548693	548740	chrVIII:548693-548740	chrVIII	549346	549347	YHR214C-B	1	-	chrVIII	548693	548740	48	*	5.89835	6.40753	5.10441	1.30312	0.000313912	0.00118467
chrX	119445	119602	chrX:119445-119602	chrX	118825	118826	YJL160C	1	-	chrX	119445	119602	158	*	5.9458	6.51972	4.97843	1.5413	0.000387555	0.00140949
chrX	136364	137257	chrX:136364-137257	chrX	136773	136774	YJL151C	1	-	chrX	136364	137257	894	*	8.33213	8.69867	7.83953	0.859143	0.00214458	0.00630303
chrX	149868	150802	chrX:149868-150802	chrX	150390	150391	YJL141C	1	-	chrX	149868	150802	935	*	8.50375	9.5015	0.181105	9.32039	2.06611e-59	1.22276e-57
chrX	157041	158226	chrX:157041-158226	chrX	157273	157274	YJL136C	1	-	chrX	157041	158226	1186	*	8.8648	9.26078	8.31722	0.943564	0.00160894	0.0048945
chrX	159556	160809	chrX:159556-160809	chrX	159847	159848	YJL133C-A	1	-	chrX	159556	160809	1254	*	8.79732	9.12327	8.37557	0.747698	0.00963683	0.0227304
chrX	393734	394073	chrX:393734-394073	chrX	393965	393966	YJL025W	1	+	chrX	393734	394073	340	*	7.52095	8.00898	6.77791	1.23107	0.000233749	0.000930709
chrX	402561	402708	chrX:402561-402708	chrX	402410	402411	YJL020C	1	-	chrX	402561	402708	148	*	6.61807	6.99417	6.10795	0.886217	0.00698353	0.0173191
chrX	405166	405545	chrX:405166-405545	chrX	405586	405587	YJL016W	1	+	chrX	405166	405545	380	*	7.51353	7.84417	7.08386	0.760309	0.0112169	0.0260329
chrX	434897	435453	chrX:434897-435453	chrX	435161	435162	YJL001W	1	+	chrX	434897	435453	557	*	7.59515	7.98689	7.0557	0.931191	0.00647756	0.0162501
chrX	520997	521829	chrX:520997-521829	chrX	521602	521603	YJR045C	1	-	chrX	520997	521829	833	*	9.16218	9.95712	7.24623	2.71089	2.19403e-08	1.97009e-07
chrX	608020	608423	chrX:608020-608423	chrX	608303	608304	YJR094W-A	1	+	chrX	608020	608423	404	*	7.68886	7.95838	7.35715	0.601229	0.04085	0.0792648
chrX	615294	615426	chrX:615294-615426	chrX	615156	615157	YJR098C	1	-	chrX	615294	615426	133	*	6.33082	6.86358	5.47696	1.38662	0.00119065	0.00377183
chrX	622790	623672	chrX:622790-623672	chrX	623014	623015	YJR104C	1	-	chrX	622790	623672	883	*	8.55961	8.96847	7.98692	0.981547	0.00165	0.0049928
chrX	633192	633626	chrX:633192-633626	chrX	633613	633614	YJR110W	1	+	chrX	633192	633626	435	*	7.52458	7.83683	7.12554	0.711284	0.0142227	0.031921
chrX	647354	648496	chrX:647354-648496	chrX	647605	647606	YJR121W	1	+	chrX	647354	648496	1143	*	9.15913	10.0628	6.20678	3.85601	2.42734e-27	5.96301e-26
chrX	705246	706182	chrX:705246-706182	chrX	705742	705743	YJR148W	1	+	chrX	705246	706182	937	*	8.95412	9.64396	7.58415	2.05981	2.91465e-10	3.27144e-09
chrXI	21455	23076	chrXI:21455-23076	chrXI	22232	22233	YKL217W	1	+	chrXI	21455	23076	1622	*	9.02051	10.0189	0.181105	9.83783	2.93051e-70	4.23948e-68
chrXI	93197	93947	chrXI:93197-93947	chrXI	93298	93299	YKL186C	1	-	chrXI	93197	93947	751	*	8.04163	8.34975	7.64932	0.70043	0.022526	0.046912
chrXI	165890	166574	chrXI:165890-166574	chrXI	165930	165931	YKL151C	1	-	chrXI	165890	166574	685	*	7.35681	8.32008	3.04279	5.27729	9.63345e-26	2.2805e-24
chrXI	171040	171462	chrXI:171040-171462	chrXI	171129	171130	YKL148C	1	-	chrXI	171040	171462	423	*	6.96173	7.95516	0.181105	7.77405	1.62524e-41	5.56858e-40
chrXI	226059	226558	chrXI:226059-226558	chrXI	226568	226569	YKL112W	1	+	chrXI	226059	226558	500	*	7.806	8.07294	7.47819	0.594746	0.0459811	0.0871433
chrXI	229912	232649	chrXI:229912-232649	chrXI	232225	232226	YKL109W	1	+	chrXI	229912	232649	2738	*	9.96619	10.3895	9.36461	1.02486	0.000142528	0.000622721
chrXI	234074	234359	chrXI:234074-234359	chrXI	234424	234425	YKL108W	1	+	chrXI	234074	234359	286	*	7.12144	7.48981	6.62553	0.864274	0.0240362	0.0495765
chrXI	278110	278387	chrXI:278110-278387	chrXI	278279	278280	YKL086W	1	+	chrXI	278110	278387	278	*	6.94318	7.46696	6.11255	1.35441	2.3264e-05	0.000127268
chrXI	278850	279076	chrXI:278850-279076	chrXI	279121	279122	YKL085W	1	+	chrXI	278850	279076	227	*	6.86795	7.25334	6.34052	0.912818	0.00372575	0.0101272
chrXI	286239	286452	chrXI:286239-286452	chrXI	286601	286602	YKL079W	1	+	chrXI	286239	286452	214	*	7.02944	7.41543	6.50088	0.914549	0.00840145	0.02037
chrXI	309950	310024	chrXI:309950-310024	chrXI	310197	310198	YKL068W	1	+	chrXI	309950	310024	75	*	6.23138	6.52841	5.8569	0.671507	0.0432188	0.0828732
chrXI	340495	341185	chrXI:340495-341185	chrXI	340546	340547	YKL052C	1	-	chrXI	340495	341185	691	*	8.28309	8.54799	7.95835	0.589643	0.0343725	0.0684296
chrXI	365261	365583	chrXI:365261-365583	chrXI	365603	365604	YKL038W	1	+	chrXI	365261	365583	323	*	7.0749	7.93875	4.60185	3.3369	4.84525e-13	7.25117e-12
chrXI	369388	370475	chrXI:369388-370475	chrXI	369889	369890	YKL035W	1	+	chrXI	369388	370475	1088	*	8.94068	9.93902	0.181105	9.75791	3.45889e-68	3.46421e-66
chrXI	381412	381616	chrXI:381412-381616	chrXI	381858	381859	YKL032C	1	-	chrXI	381412	381616	205	*	6.9693	7.84878	4.32812	3.52066	1.84272e-06	1.24959e-05
chrXI	387328	387673	chrXI:387328-387673	chrXI	387560	387561	YKL027W	1	+	chrXI	387328	387673	346	*	7.17165	7.69856	6.33297	1.36559	0.000538153	0.00187346
chrXI	393458	393643	chrXI:393458-393643	chrXI	393719	393720	YKL023W	1	+	chrXI	393458	393643	186	*	6.93678	7.24814	6.53918	0.708956	0.0246833	0.0506567
chrXI	521802	521840	chrXI:521802-521840	chrXI	521712	521713	YKR043C	1	-	chrXI	521802	521840	39	*	6.00435	6.54889	5.11924	1.42966	4.66179e-05	0.000236173
chrXI	589691	590178	chrXI:589691-590178	chrXI	590393	590394	YKR080W	1	+	chrXI	589691	590178	488	*	7.38586	7.78882	6.82475	0.964075	0.00435283	0.0115897
chrXI	608533	608896	chrXI:608533-608896	chrXI	608944	608945	YKR090W	1	+	chrXI	608533	608896	364	*	7.31872	7.64232	6.90088	0.741444	0.0219812	0.0463099
chrXI	618692	619043	chrXI:618692-619043	chrXI	618750	618751	YKR094C	1	-	chrXI	618692	619043	352	*	7.61558	7.88056	7.29072	0.589841	0.0509983	0.0958149
chrXII	39516	39765	chrXII:39516-39765	chrXII	39471	39472	YLL051C	1	-	chrXII	39516	39765	250	*	6.92882	7.35076	6.32994	1.02082	0.000938468	0.00310123
chrXII	64825	65549	chrXII:64825-65549	chrXII	65207	65208	YLL039C	1	-	chrXII	64825	65549	725	*	8.51652	9.42264	5.52811	3.89452	7.81592e-05	0.000370048
chrXII	88344	88710	chrXII:88344-88710	chrXII	88621	88622	YLL026W	1	+	chrXII	88344	88710	367	*	7.31943	8.19541	4.71771	3.4777	1.08928e-21	2.28749e-20
chrXII	96939	97994	chrXII:96939-97994	chrXII	97485	97486	YLL024C	1	-	chrXII	96939	97994	1056	*	9.45806	9.88335	8.85237	1.03098	0.000278299	0.00106887
chrXII	108086	109133	chrXII:108086-109133	chrXII	108972	108973	YLL018C-A	1	-	chrXII	108086	109133	1048	*	8.80694	9.42409	7.70584	1.71826	1.20783e-08	1.14726e-07
chrXII	163974	164232	chrXII:163974-164232	chrXII	163893	163894	YLR006C	1	-	chrXII	163974	164232	259	*	7.11727	7.45911	6.66841	0.790709	0.0165926	0.0362477
chrXII	300295	300571	chrXII:300295-300571	chrXII	300251	300252	YLR084C	1	-	chrXII	300295	300571	277	*	7.22971	7.56322	6.79516	0.768069	0.0355344	0.070206
chrXII	319754	320859	chrXII:319754-320859	chrXII	320015	320016	YLR089C	1	-	chrXII	319754	320859	1106	*	8.45989	9.45756	0.181105	9.27646	2.9357e-55	1.19446e-53
chrXII	470570	470771	chrXII:470570-470771	chrXII	470405	470406	YLR155C	1	-	chrXII	470570	470771	202	*	6.43037	7.1768	4.79713	2.37967	1.60105e-11	2.04369e-10
chrXII	493432	494040	chrXII:493432-494040	chrXII	493881	493882	YLR164W	1	+	chrXII	493432	494040	609	*	6.97073	7.9642	0.181105	7.78309	7.89875e-32	2.28537e-30
chrXII	510328	511516	chrXII:510328-511516	chrXII	511052	511053	YLR177W	1	+	chrXII	510328	511516	1189	*	8.91825	9.91656	0.181105	9.73546	5.85242e-66	5.0799e-64
chrXII	514712	515161	chrXII:514712-515161	chrXII	514713	514714	YLR179C	1	-	chrXII	514712	515161	450	*	7.87706	8.17228	7.50545	0.666829	0.0231716	0.0480406
chrXII	534531	535052	chrXII:534531-535052	chrXII	534393	534394	YLR189C	1	-	chrXII	534531	535052	522	*	7.87567	8.53556	6.6243	1.91126	2.19636e-09	2.2517e-08
chrXII	585896	586290	chrXII:585896-586290	chrXII	586462	586463	YLR224W	1	+	chrXII	585896	586290	395	*	7.50376	7.91307	6.9302	0.982868	0.000845231	0.00282902
chrXII	588676	589306	chrXII:588676-589306	chrXII	588918	588919	YLR225C	1	-	chrXII	588676	589306	631	*	8.23798	8.78287	7.35193	1.43094	3.78464e-06	2.41549e-05
chrXII	645529	646573	chrXII:645529-646573	chrXII	645953	645954	YLR255C	1	-	chrXII	645529	646573	1045	*	8.78047	9.19439	8.19775	0.996647	0.000585842	0.00202325
chrXII	660041	661343	chrXII:660041-661343	chrXII	660714	660715	YLR258W	1	+	chrXII	660041	661343	1303	*	9.07554	10.074	0.181105	9.89292	3.37116e-70	4.38925e-68
chrXII	664290	665192	chrXII:664290-665192	chrXII	665002	665003	YLR259C	1	-	chrXII	664290	665192	903	*	8.87941	9.68722	6.87615	2.81107	5.05848e-12	6.72055e-11
chrXII	699520	699789	chrXII:699520-699789	chrXII	699495	699496	YLR277C	1	-	chrXII	699520	699789	270	*	7.01948	7.486	6.32569	1.16032	0.00374776	0.0101658
chrXII	736752	737885	chrXII:736752-737885	chrXII	737548	737549	YLR304C	1	-	chrXII	736752	737885	1134	*	9.18007	10.0723	6.38385	3.68844	1.4031e-13	2.14922e-12
chrXII	782858	784823	chrXII:782858-784823	chrXII	783387	783388	YLR327C	1	-	chrXII	782858	784823	1966	*	9.47548	10.1741	8.06839	2.10569	1.31496e-12	1.9023e-11
chrXII	787437	787795	chrXII:787437-787795	chrXII	787662	787663	YLR330W	1	+	chrXII	787437	787795	359	*	7.42426	7.99534	6.46513	1.53022	7.44321e-06	4.47963e-05
chrXII	805134	805237	chrXII:805134-805237	chrXII	805106	805107	YLR337C	1	-	chrXII	805134	805237	104	*	5.8502	6.57476	4.32569	2.24907	1.22573e-08	1.14813e-07
chrXII	833730	833980	chrXII:833730-833980	chrXII	834350	834351	YLR353W	1	+	chrXII	833730	833980	251	*	6.95455	7.61864	5.68724	1.9314	4.81091e-06	3.01145e-05
chrXII	921170	922003	chrXII:921170-922003	chrXII	921596	921597	YLR399C	1	-	chrXII	921170	922003	834	*	8.68631	9.14932	8.00033	1.14899	8.86903e-05	0.000415377
chrXII	1011394	1012778	chrXII:1011394-1012778	chrXII	1012023	1012024	YLR437C	1	-	chrXII	1011394	1012778	1385	*	9.07253	9.66165	8.06	1.60164	1.3355e-08	1.23321e-07
chrXIII	15960	16880	chrXIII:15960-16880	chrXIII	16676	16677	YML128C	1	-	chrXIII	15960	16880	921	*	8.83872	9.83693	0.181105	9.65583	5.61497e-59	3.17856e-57
chrXIII	26056	27119	chrXIII:26056-27119	chrXIII	26418	26419	YML122C	1	-	chrXIII	26056	27119	1064	*	8.45445	8.75221	8.07882	0.673394	0.0440029	0.0842525
chrXIII	69851	71337	chrXIII:69851-71337	chrXIII	70088	70089	YML101C	1	-	chrXIII	69851	71337	1487	*	9.47366	10.3222	7.14672	3.1755	1.89629e-20	3.74086e-19
chrXIII	90711	91275	chrXIII:90711-91275	chrXIII	90731	90732	YML091C	1	-	chrXIII	90711	91275	565	*	8.10963	8.53503	7.50371	1.03132	0.000375364	0.00138057
chrXIII	119061	119545	chrXIII:119061-119545	chrXIII	118898	118899	YML075C	1	-	chrXIII	119061	119545	485	*	7.283	7.73904	6.61237	1.12667	0.000159259	0.000673231
chrXIII	169593	170538	chrXIII:169593-170538	chrXIII	169754	169755	YML053C	1	-	chrXIII	169593	170538	946	*	8.66496	9.10544	8.02772	1.07773	0.000336562	0.00126283
chrXIII	208972	209473	chrXIII:208972-209473	chrXIII	209523	209524	YML034W	1	+	chrXIII	208972	209473	502	*	7.64221	7.9884	7.18581	0.80259	0.0284737	0.0572994
chrXIII	253198	253916	chrXIII:253198-253916	chrXIII	253272	253273	YML007C-A	1	-	chrXIII	253198	253916	719	*	8.31877	8.6247	7.93	0.6947	0.0220721	0.0464264
chrXIII	271282	272388	chrXIII:271282-272388	chrXIII	271577	271578	YMR001C-A	1	-	chrXIII	271282	272388	1107	*	9.06489	9.50098	8.43687	1.06411	0.000127866	0.000562436
chrXIII	334129	335229	chrXIII:334129-335229	chrXIII	334707	334708	YMR031W-A	1	+	chrXIII	334129	335229	1101	*	8.75235	9.6172	6.2692	3.348	2.56766e-05	0.000139295
chrXIII	347802	348706	chrXIII:347802-348706	chrXIII	348260	348261	YMR038C	1	-	chrXIII	347802	348706	905	*	8.62633	9.173	7.73546	1.43754	2.64401e-05	0.000142843
chrXIII	430783	432550	chrXIII:430783-432550	chrXIII	431095	431096	YMR081C	1	-	chrXIII	430783	432550	1768	*	8.51672	9.49093	3.6981	5.79283	3.56464e-20	6.92711e-19
chrXIII	434404	434847	chrXIII:434404-434847	chrXIII	434786	434787	YMR083W	1	+	chrXIII	434404	434847	444	*	7.37686	7.74205	6.88671	0.855335	0.00903126	0.0216153
chrXIII	438996	439162	chrXIII:438996-439162	chrXIII	439206	439207	YMR086W	1	+	chrXIII	438996	439162	167	*	6.16389	6.90419	4.5621	2.34209	6.61034e-08	5.66228e-07
chrXIII	462900	462949	chrXIII:462900-462949	chrXIII	462609	462610	YMR098C	1	-	chrXIII	462900	462949	50	*	5.26908	6.14106	2.71121	3.42985	3.9877e-12	5.40832e-11
chrXIII	477215	477884	chrXIII:477215-477884	chrXIII	477606	477607	YMR105C	1	-	chrXIII	477215	477884	670	*	8.20435	9.20158	0.181105	9.02047	2.72363e-58	1.36391e-56
chrXIII	482499	483843	chrXIII:482499-483843	chrXIII	483012	483013	YMR107W	1	+	chrXIII	482499	483843	1345	*	8.58218	9.39967	6.50921	2.89046	3.85831e-12	5.28792e-11
chrXIII	540172	541555	chrXIII:540172-541555	chrXIII	541197	541198	YMR136W	1	+	chrXIII	540172	541555	1384	*	8.978	9.32908	8.51302	0.816058	0.00619409	0.0155689
chrXIII	605461	606041	chrXIII:605461-606041	chrXIII	605520	605521	YMR171C	1	-	chrXIII	605461	606041	581	*	7.80085	8.3888	6.79185	1.59695	1.26828e-07	1.03855e-06
chrXIII	608447	608912	chrXIII:608447-608912	chrXIII	608687	608688	YMR173W	1	+	chrXIII	608447	608912	466	*	7.63176	8.42641	5.71771	2.70869	5.06449e-15	8.24245e-14
chrXIII	623236	623693	chrXIII:623236-623693	chrXIII	623213	623214	YMR180C	1	-	chrXIII	623236	623693	458	*	7.75548	8.37886	6.63367	1.74519	2.25124e-07	1.77644e-06
chrXIII	624125	624377	chrXIII:624125-624377	chrXIII	624080	624081	YMR181C	1	-	chrXIII	624125	624377	253	*	7.2102	7.56577	6.7373	0.828471	0.00956206	0.0225949
chrXIII	632206	632907	chrXIII:632206-632907	chrXIII	632353	632354	YMR186W	1	+	chrXIII	632206	632907	702	*	8.98192	9.60381	7.86509	1.73872	3.02127e-08	2.6579e-07
chrXIII	667128	667509	chrXIII:667128-667509	chrXIII	667456	667457	RNA170	1	-	chrXIII	667128	667509	382	*	7.34467	7.95581	6.26317	1.69264	1.13622e-05	6.66375e-05
chrXIII	773344	775597	chrXIII:773344-775597	chrXIII	774750	774751	YMR251W-A	1	+	chrXIII	773344	775597	2254	*	9.55277	10.3714	7.47119	2.90022	2.30751e-22	4.9252e-21
chrXIII	851764	853123	chrXIII:851764-853123	chrXIII	852628	852629	YMR291W	1	+	chrXIII	851764	853123	1360	*	9.34533	10.0374	7.96598	2.07142	9.63389e-13	1.40936e-11
chrXIII	860863	861390	chrXIII:860863-861390	chrXIII	860891	860892	YMR296C	1	-	chrXIII	860863	861390	528	*	7.51253	7.93466	6.91329	1.02138	0.00224358	0.006535
chrXIII	901470	901755	chrXIII:901470-901755	chrXIII	901707	901708	YMR314W	1	+	chrXIII	901470	901755	286	*	6.68286	7.13339	6.02416	1.10923	0.00396615	0.0106473
chrXIII	912222	912284	chrXIII:912222-912284	chrXIII	912143	912144	YMR318C	1	-	chrXIII	912222	912284	63	*	6.00634	6.58353	5.0294	1.55413	0.00259521	0.00736156
chrXIV	187133	187396	chrXIV:187133-187396	chrXIV	187496	187497	YNL244C	1	-	chrXIV	187133	187396	264	*	7.29174	7.75607	6.60286	1.15321	0.000262218	0.00101609
chrXIV	273070	274222	chrXIV:273070-274222	chrXIV	273615	273616	YNL194C	1	-	chrXIV	273070	274222	1153	*	8.83331	9.83151	0.181105	9.65041	5.97673e-62	3.89085e-60
chrXIV	289155	289515	chrXIV:289155-289515	chrXIV	289496	289497	YNL186W	1	+	chrXIV	289155	289515	361	*	7.39412	7.82292	6.78124	1.04168	0.00101407	0.00327621
chrXIV	310158	310488	chrXIV:310158-310488	chrXIV	310057	310058	YNL173C	1	-	chrXIV	310158	310488	331	*	7.17868	7.56741	6.64493	0.92248	0.00452094	0.0119115
chrXIV	365875	366087	chrXIV:365875-366087	chrXIV	366031	366032	YNL138W-A	1	+	chrXIV	365875	366087	213	*	6.39633	7.30789	3.32447	3.98342	3.61474e-15	5.95746e-14
chrXIV	391922	392539	chrXIV:391922-392539	chrXIV	392167	392168	YNL125C	1	-	chrXIV	391922	392539	618	*	7.53448	8.49104	3.45931	5.03173	4.74447e-30	1.28694e-28
chrXIV	426637	427545	chrXIV:426637-427545	chrXIV	426717	426718	YNL103W-A	1	+	chrXIV	426637	427545	909	*	8.05442	8.49149	7.42435	1.06714	0.00129611	0.00405657
chrXIV	440106	441022	chrXIV:440106-441022	chrXIV	440570	440571	YNL098C	1	-	chrXIV	440106	441022	917	*	8.32681	9.23632	5.28682	3.9495	3.07869e-05	0.000164281
chrXIV	480903	481677	chrXIV:480903-481677	chrXIV	481389	481390	YNL077W	1	+	chrXIV	480903	481677	775	*	8.02023	8.67489	6.78832	1.88656	6.83073e-09	6.63702e-08
chrXIV	518488	519164	chrXIV:518488-519164	chrXIV	518845	518846	YNL055C	1	-	chrXIV	518488	519164	677	*	8.19755	8.95221	6.52069	2.43152	4.17564e-11	5.12895e-10
chrXIV	532255	532622	chrXIV:532255-532622	chrXIV	532657	532658	YNL051W	1	+	chrXIV	532255	532622	368	*	7.41672	7.96793	6.51349	1.45444	1.89937e-05	0.000104345
chrXIV	551973	552125	chrXIV:551973-552125	chrXIV	551987	551988	YNL041C	1	-	chrXIV	551973	552125	153	*	6.30562	7.29524	0.181105	7.11414	5.80606e-33	1.75802e-31
chrXIV	558701	560884	chrXIV:558701-560884	chrXIV	559002	559003	YNL037C	1	-	chrXIV	558701	560884	2184	*	9.93877	10.4566	9.12323	1.33338	0.000174704	0.000724409
chrXIV	585359	585461	chrXIV:585359-585461	chrXIV	585291	585292	YNL025C	1	-	chrXIV	585359	585461	103	*	6.63627	7.0328	6.08764	0.945164	0.00465317	0.01219
chrXIV	618159	620102	chrXIV:618159-620102	chrXIV	618241	618242	YNL008C	1	-	chrXIV	618159	620102	1944	*	9.88708	10.5103	8.76579	1.74453	5.79294e-10	6.39187e-09
chrXIV	630323	632037	chrXIV:630323-632037	chrXIV	631061	631062	YNR001C	1	-	chrXIV	630323	632037	1715	*	10.0023	10.4522	9.34496	1.10724	0.000125085	0.000553946
chrXIV	640198	640431	chrXIV:640198-640431	chrXIV	640394	640395	YNR008W	1	+	chrXIV	640198	640431	234	*	6.79319	7.63135	4.55692	3.07443	2.31678e-06	1.55487e-05
chrXIV	665006	665413	chrXIV:665006-665413	chrXIV	665337	665338	YNR019W	1	+	chrXIV	665006	665413	408	*	7.70042	8.29846	6.66046	1.638	1.74557e-07	1.38581e-06
chrXV	27610	28964	chrXV:27610-28964	chrXV	27082	27083	YOL155W-A	1	+	chrXV	27610	28964	1355	*	9.82222	10.2439	9.22399	1.01986	0.000154411	0.000655297
chrXV	82436	83644	chrXV:82436-83644	chrXV	82920	82921	YOL126C	1	-	chrXV	82436	83644	1209	*	9.06821	9.53273	8.37887	1.15386	3.21459e-05	0.000170833
chrXV	216269	217357	chrXV:216269-217357	chrXV	217124	217125	YOL059W	1	+	chrXV	216269	217357	1089	*	8.39523	8.73808	7.94464	0.79344	0.00452858	0.0119115
chrXV	231515	232336	chrXV:231515-232336	chrXV	231755	231756	YOL052C-A	1	-	chrXV	231515	232336	822	*	7.92368	8.64078	6.43412	2.20665	3.85048e-09	3.82697e-08
chrXV	242910	243113	chrXV:242910-243113	chrXV	242747	242748	YOL047C	1	-	chrXV	242910	243113	204	*	7.05131	7.63161	6.06521	1.56641	1.42142e-05	8.01161e-05
chrXV	285390	286009	chrXV:285390-286009	chrXV	285426	285427	YOL021C	1	-	chrXV	285390	286009	620	*	7.94135	8.2649	7.52361	0.741293	0.00906973	0.0216278
chrXV	292111	292512	chrXV:292111-292512	chrXV	292527	292528	YOL017W	1	+	chrXV	292111	292512	402	*	7.36318	7.83293	6.66215	1.17078	0.000192859	0.000787153
chrXV	315140	315698	chrXV:315140-315698	chrXV	315387	315388	YOL006C	1	-	chrXV	315140	315698	559	*	7.85104	8.42221	6.89165	1.53055	1.73298e-07	1.38426e-06
chrXV	361230	361502	chrXV:361230-361502	chrXV	361410	361411	YOR017W	1	+	chrXV	361230	361502	273	*	6.82649	7.71332	4.09801	3.61531	8.38478e-07	6.13314e-06
chrXV	367797	368107	chrXV:367797-368107	chrXV	368125	368126	YOR019W	1	+	chrXV	367797	368107	311	*	7.06396	7.95159	4.32569	3.62591	3.50973e-19	6.43616e-18
chrXV	384370	385260	chrXV:384370-385260	chrXV	384420	384421	YOR028C	1	-	chrXV	384370	385260	891	*	8.10074	8.42622	7.67976	0.746459	0.0394285	0.0768501
chrXV	446809	447284	chrXV:446809-447284	chrXV	446738	446739	YOR064C	1	-	chrXV	446809	447284	476	*	7.74755	8.01417	7.42022	0.593946	0.0395687	0.0770082
chrXV	472230	472598	chrXV:472230-472598	chrXV	472723	472724	YOR078W	1	+	chrXV	472230	472598	369	*	7.41199	8.02639	6.31989	1.70649	1.19222e-07	9.82449e-07
chrXV	479252	479969	chrXV:479252-479969	chrXV	479531	479532	YOR083W	1	+	chrXV	479252	479969	718	*	8.6295	9.04887	8.03583	1.01303	0.000284716	0.0010871
chrXV	514826	515183	chrXV:514826-515183	chrXV	515242	515243	YOR101W	1	+	chrXV	514826	515183	358	*	7.23864	7.56299	6.81957	0.743418	0.0188253	0.0401812
chrXV	550351	550554	chrXV:550351-550554	chrXV	550246	550247	YOR119C	1	-	chrXV	550351	550554	204	*	6.71305	7.20046	5.97144	1.22902	0.0110906	0.0258317
chrXV	579562	580469	chrXV:579562-580469	chrXV	580248	580249	YOR136W	1	+	chrXV	579562	580469	908	*	8.4058	9.07909	7.10281	1.97628	3.35579e-11	4.16119e-10
chrXV	638315	639004	chrXV:638315-639004	chrXV	638558	638559	YOR161C	1	-	chrXV	638315	639004	690	*	8.23868	8.91402	6.92759	1.98643	3.10198e-11	3.88343e-10
chrXV	649110	649299	chrXV:649110-649299	chrXV	649301	649302	YOR168W	1	+	chrXV	649110	649299	190	*	6.70502	7.19617	5.95461	1.24155	0.000126714	0.000559261
chrXV	657061	657811	chrXV:657061-657811	chrXV	657262	657263	YOR173W	1	+	chrXV	657061	657811	751	*	7.91576	8.91237	0.181105	8.73126	1.01151e-50	3.76281e-49
chrXV	670032	671549	chrXV:670032-671549	chrXV	670241	670242	YOR178C	1	-	chrXV	670032	671549	1518	*	8.70035	9.29421	7.67332	1.62089	1.29025e-08	1.19993e-07
chrXV	683670	683798	chrXV:683670-683798	chrXV	683538	683539	YOR186C-A	1	-	chrXV	683670	683798	129	*	5.80276	6.17527	5.29927	0.876001	0.0162898	0.0357843
chrXV	722740	723044	chrXV:722740-723044	chrXV	722909	722910	YOR204W	1	+	chrXV	722740	723044	305	*	7.41921	8.01029	6.40071	1.60959	1.13798e-07	9.4373e-07
chrXV	761820	762491	chrXV:761820-762491	chrXV	762084	762085	YOR226C	1	-	chrXV	761820	762491	672	*	7.98188	8.53263	7.0799	1.45273	0.000967949	0.00316349
chrXV	770254	771225	chrXV:770254-771225	chrXV	770798	770799	YOR230W	1	+	chrXV	770254	771225	972	*	8.40549	9.1654	6.69998	2.46543	1.38913e-12	1.96593e-11
chrXV	824738	826155	chrXV:824738-826155	chrXV	824867	824868	YOR267C	1	-	chrXV	824738	826155	1418	*	8.81879	9.26282	8.17402	1.0888	0.000172276	0.00072012
chrXV	836063	837666	chrXV:836063-837666	chrXV	836431	836432	YOR273C	1	-	chrXV	836063	837666	1604	*	9.02066	9.68837	7.73947	1.9489	1.62344e-10	1.92157e-09
chrXV	844676	844703	chrXV:844676-844703	chrXV	844630	844631	YOR279C	1	-	chrXV	844676	844703	28	*	5.80002	6.51326	4.32812	2.18514	0.00160117	0.00488227
chrXV	877100	878385	chrXV:877100-878385	chrXV	877685	877686	YOR298C-A	1	-	chrXV	877100	878385	1286	*	9.56899	10.093	8.73781	1.35517	1.31228e-05	7.56013e-05
chrXV	908409	909930	chrXV:908409-909930	chrXV	909341	909342	YOR317W	1	+	chrXV	908409	909930	1522	*	9.10189	9.66455	8.16682	1.49773	2.90851e-06	1.91257e-05
chrXV	912213	912728	chrXV:912213-912728	chrXV	912436	912437	YOR318C	1	-	chrXV	912213	912728	516	*	7.94443	8.243	7.56751	0.675484	0.0222286	0.0466136
chrXV	949283	949679	chrXV:949283-949679	chrXV	949771	949772	YOR336W	1	+	chrXV	949283	949679	397	*	7.21982	7.52249	6.83633	0.686157	0.0426224	0.0823358
chrXV	1039379	1041620	chrXV:1039379-1041620	chrXV	1039838	1039839	YOR374W	1	+	chrXV	1039379	1041620	2242	*	10.4342	11.4336	0.181105	11.2525	3.07948e-88	5.72783e-86
chrXV	1043095	1043455	chrXV:1043095-1043455	chrXV	1043189	1043190	YOR376W	1	+	chrXV	1043095	1043455	361	*	7.30194	7.66799	6.81024	0.857742	0.00448692	0.0118498
chrXVI	40375	41838	chrXVI:40375-41838	chrXVI	41041	41042	YPL265W	1	+	chrXVI	40375	41838	1464	*	9.47502	10.2321	7.78523	2.44684	1.55835e-15	2.63503e-14
chrXVI	46618	47135	chrXVI:46618-47135	chrXVI	46506	46507	YPL263C	1	-	chrXVI	46618	47135	518	*	7.12362	8.05487	3.6981	4.35677	1.70965e-13	2.58833e-12
chrXVI	98403	99267	chrXVI:98403-99267	chrXVI	98625	98626	YPL240C	1	-	chrXVI	98403	99267	865	*	8.59244	9.33606	6.97377	2.36228	9.74215e-11	1.17447e-09
chrXVI	132304	133442	chrXVI:132304-133442	chrXVI	133041	133042	YPL221W	1	+	chrXVI	132304	133442	1139	*	8.78477	9.26625	8.05698	1.20927	9.39273e-05	0.000436562
chrXVI	150212	150567	chrXVI:150212-150567	chrXVI	150191	150192	YPL214C	1	-	chrXVI	150212	150567	356	*	7.07067	7.55603	6.33388	1.22215	0.000339418	0.00126989
chrXVI	163662	163953	chrXVI:163662-163953	chrXVI	163597	163598	YPL206C	1	-	chrXVI	163662	163953	292	*	6.56144	7.01718	5.89145	1.12573	0.00161288	0.00489504
chrXVI	169478	169627	chrXVI:169478-169627	chrXVI	169338	169339	YPL202C	1	-	chrXVI	169478	169627	150	*	6.54971	6.89237	6.09943	0.792939	0.0119191	0.0273794
chrXVI	188117	188882	chrXVI:188117-188882	chrXVI	188513	188514	YPL189C-A	1	-	chrXVI	188117	188882	766	*	8.10495	8.74125	6.93898	1.80227	3.5192e-05	0.000185243
chrXVI	218503	218536	chrXVI:218503-218536	chrXVI	218628	218629	YPL175W	1	+	chrXVI	218503	218536	34	*	5.67653	6.17671	4.90455	1.27216	0.0022289	0.00650679
chrXVI	260763	261341	chrXVI:260763-261341	chrXVI	260931	260932	YPL154C	1	-	chrXVI	260763	261341	579	*	8.04751	8.95776	4.99613	3.96163	1.22651e-16	2.18756e-15
chrXVI	296671	298219	chrXVI:296671-298219	chrXVI	297551	297552	YPL135W	1	+	chrXVI	296671	298219	1549	*	9.59758	10.197	8.55329	1.64372	2.42445e-08	2.16208e-07
chrXVI	308204	308628	chrXVI:308204-308628	chrXVI	308221	308222	YPL128C	1	-	chrXVI	308204	308628	425	*	7.59148	8.0699	6.87074	1.19916	0.000111159	0.00050253
chrXVI	309612	310059	chrXVI:309612-310059	chrXVI	309604	309605	YPL127C	1	-	chrXVI	309612	310059	448	*	7.70374	8.04845	7.24992	0.798527	0.0161531	0.035586
chrXVI	452283	454376	chrXVI:452283-454376	chrXVI	453057	453058	YPL057C	1	-	chrXVI	452283	454376	2094	*	9.59526	10.4605	7.1076	3.35295	1.74217e-21	3.60048e-20
chrXVI	454668	455660	chrXVI:454668-455660	chrXVI	454990	454991	YPL055C	1	-	chrXVI	454668	455660	993	*	8.05657	8.84952	6.15359	2.69593	6.0486e-12	7.87527e-11
chrXVI	502047	503238	chrXVI:502047-503238	chrXVI	502183	502184	YPL026C	1	-	chrXVI	502047	503238	1192	*	8.76485	9.05774	8.39695	0.660792	0.017682	0.0382425
chrXVI	550891	552093	chrXVI:550891-552093	chrXVI	551657	551658	YPL004C	1	-	chrXVI	550891	552093	1203	*	9.80817	10.6014	7.90312	2.69831	1.06416e-19	2.00802e-18
chrXVI	558181	558552	chrXVI:558181-558552	chrXVI	558383	558384	YPR002W	1	+	chrXVI	558181	558552	372	*	7.4856	7.79058	7.09837	0.692218	0.0445647	0.0849536
chrXVI	586598	586887	chrXVI:586598-586887	chrXVI	587518	587519	YPR014C	1	-	chrXVI	586598	586887	290	*	6.77903	7.33132	5.87282	1.4585	5.69942e-06	3.53364e-05
chrXVI	614414	614919	chrXVI:614414-614919	chrXVI	614558	614559	YPR025C	1	-	chrXVI	614414	614919	506	*	6.98943	7.95571	2.55381	5.4019	2.28043e-29	5.82181e-28
chrXVI	627291	628292	chrXVI:627291-628292	chrXVI	627878	627879	YPR030W	1	+	chrXVI	627291	628292	1002	*	8.19911	9.19632	0.181105	9.01522	8.37118e-58	3.8926e-56
chrXVI	641200	642536	chrXVI:641200-642536	chrXVI	642206	642207	YPR035W	1	+	chrXVI	641200	642536	1337	*	9.06177	9.31873	8.74892	0.56981	0.0486652	0.0916962
chrXVI	645104	646544	chrXVI:645104-646544	chrXVI	645948	645949	YPR036W-A	1	+	chrXVI	645104	646544	1441	*	9.86709	10.1725	9.47912	0.69342	0.0182857	0.0392039
chrXVI	678475	679649	chrXVI:678475-679649	chrXVI	678949	678950	YPR064W	1	+	chrXVI	678475	679649	1175	*	8.81757	9.09176	8.47874	0.613022	0.0262583	0.0536708
chrXVI	742242	742359	chrXVI:742242-742359	chrXVI	742452	742453	YPR108W	1	+	chrXVI	742242	742359	118	*	5.99144	6.69775	4.55069	2.14706	0.000110915	0.00050253
chrXVI	785643	786747	chrXVI:785643-786747	chrXVI	786206	786207	YPR124W	1	+	chrXVI	785643	786747	1105	*	9.42187	9.81331	8.88299	0.930313	0.000849752	0.00283686
chrXVI	794432	795181	chrXVI:794432-795181	chrXVI	794498	794499	YPR131C	1	-	chrXVI	794432	795181	750	*	8.45955	8.85156	7.91955	0.932014	0.000884541	0.00293047
chrXVI	828857	831122	chrXVI:828857-831122	chrXVI	829916	829917	YPR149W	1	+	chrXVI	828857	831122	2266	*	10.453	10.8514	9.9006	0.950852	0.000450962	0.0016175
chrXVI	901558	902121	chrXVI:901558-902121	chrXVI	902042	902043	YPR184W	1	+	chrXVI	901558	902121	564	*	7.43295	8.20375	5.66576	2.53799	5.42637e-14	8.51221e-13
chrXVI	921076	921446	chrXVI:921076-921446	chrXVI	921858	921859	YPR192W	1	+	chrXVI	921076	921446	371	*	6.44376	6.82053	5.9324	0.888134	0.00528414	0.0135166

## Sheet: 139 genes downregulated
diffbind_chrom	diffbind_start	diffbind_end	diffbind_name	closest_tss_chrom	closest_tss_start	closest_tss_end	closest_gene	score	gene_strand	seqnames	start	end	width	strand	Conc	Conc_gly_pt11	Conc_w_pt11	Fold	p.value	FDR
chrI	2	104	chrI:2-104	chrI	333	334	YAL069W	1	+	chrI	2	104	103	*	6.63856	6.02748	7.06648	-1.039	0.00157922	0.00483799
chrI	20746	21092	chrI:20746-21092	chrI	21564	21565	YAL064W	1	+	chrI	20746	21092	347	*	7.05401	6.5545	7.42435	-0.869845	0.00371608	0.010122
chrI	70848	73625	chrI:70848-73625	chrI	71784	71785	YAL038W	1	+	chrI	70848	73625	2778	*	10.6824	10.3561	10.9483	-0.592229	0.026521	0.0540382
chrI	143013	143522	chrI:143013-143522	chrI	143705	143706	YAL002W	1	+	chrI	143013	143522	510	*	8.44609	8.07968	8.73804	-0.658361	0.0319154	0.063929
chrI	223110	223374	chrI:223110-223374	chrI	222404	222405	YAR068W	1	+	chrI	223110	223374	265	*	7.60312	7.0934	7.97901	-0.885606	0.00668031	0.0166944
chrI	230124	230204	chrI:230124-230204	chrI	228842	228843	YAR075W	1	+	chrI	230124	230204	81	*	5.99145	5.34238	6.43751	-1.09513	0.00202805	0.00600119
chrII	26	123	chrII:26-123	chrII	644	645	YBL113W-A	1	+	chrII	26	123	98	*	5.86333	5.37155	6.22941	-0.857854	0.0180667	0.0389451
chrII	5626	5809	chrII:5626-5809	chrII	5788	5789	YBL109W	1	+	chrII	5626	5809	184	*	6.32886	5.85305	6.68606	-0.833004	0.00915327	0.0217482
chrII	87970	88631	chrII:87970-88631	chrII	88188	88189	snR56	1	+	chrII	87970	88631	662	*	8.42674	7.73297	8.89325	-1.16028	0.000287833	0.00109579
chrII	237660	238431	chrII:237660-238431	chrII	237467	237468	YBL001C	1	-	chrII	237660	238431	772	*	8.50537	8.15483	8.78716	-0.632339	0.0442707	0.0845168
chrII	605049	606339	chrII:605049-606339	chrII	605964	605965	YBR190W	1	+	chrII	605049	606339	1291	*	8.95739	8.47874	9.31618	-0.837443	0.00474737	0.0123621
chrII	613949	614621	chrII:613949-614621	chrII	614173	614174	YBR196C-A	1	-	chrII	613949	614621	673	*	8.04618	7.6894	8.33199	-0.642592	0.0268728	0.054584
chrIII	8	492	chrIII:8-492	chrIII	1390	1391	YCL076W	1	+	chrIII	8	492	485	*	9.28068	8.62372	9.73042	-1.10669	8.52879e-05	0.000402336
chrIII	78216	78779	chrIII:78216-78779	chrIII	77919	77920	YCL025C	1	-	chrIII	78216	78779	564	*	7.89356	7.55589	8.16699	-0.611101	0.0323122	0.0646026
chrIII	316477	316615	chrIII:316477-316615	chrIII	316188	316189	YCR108C	1	-	chrIII	316477	316615	139	*	6.87047	6.29599	7.28024	-0.984251	0.00203446	0.0060065
chrIV	1	161	chrIV:1-161	chrIV	1800	1801	YDL248W	1	+	chrIV	1	161	161	*	7.98893	7.38542	8.41315	-1.02773	0.000492131	0.00174365
chrIV	46034	46182	chrIV:46034-46182	chrIV	45918	45919	YDL228C	1	-	chrIV	46034	46182	149	*	6.39292	4.93617	7.10281	-2.16665	0.00472124	0.0123355
chrIV	215843	215922	chrIV:215843-215922	chrIV	216527	216528	YDL137W	1	+	chrIV	215843	215922	80	*	5.87625	5.37563	6.24719	-0.871561	0.0448281	0.0853307
chrIV	226814	227112	chrIV:226814-227112	chrIV	227391	227392	YDL131W	1	+	chrIV	226814	227112	299	*	6.4127	5.36732	7.01248	-1.64516	0.000386257	0.00140949
chrIV	356962	357664	chrIV:356962-357664	chrIV	356759	356760	YDL055C	1	-	chrIV	356962	357664	703	*	7.81518	7.3869	8.14499	-0.758093	0.00802779	0.0195734
chrIV	508709	509740	chrIV:508709-509740	chrIV	508145	508146	YDR033W	1	+	chrIV	508709	509740	1032	*	8.79799	7.58837	9.44656	-1.85819	5.52572e-08	4.76456e-07
chrIV	677999	678060	chrIV:677999-678060	chrIV	679542	679543	YDR112W	1	+	chrIV	677999	678060	62	*	6.62672	5.72264	7.17824	-1.45561	7.61404e-05	0.000364466
chrIV	914778	915378	chrIV:914778-915378	chrIV	914712	914713	YDR224C	1	-	chrIV	914778	915378	601	*	7.27736	6.78355	7.64457	-0.861016	0.0103729	0.0243342
chrIV	1150642	1151129	chrIV:1150642-1151129	chrIV	1150879	1150880	YDR340W	1	+	chrIV	1150642	1151129	488	*	8.30319	7.83005	8.65889	-0.828848	0.00540194	0.0137908
chrIV	1345237	1345549	chrIV:1345237-1345549	chrIV	1345645	1345646	YDR442W	1	+	chrIV	1345237	1345549	313	*	7.11334	6.74026	7.40949	-0.669238	0.0263282	0.0537294
chrIV	1402580	1403238	chrIV:1402580-1403238	chrIV	1402917	1402918	snR13	1	+	chrIV	1402580	1403238	659	*	8.27577	7.89026	8.57969	-0.689428	0.0487768	0.0917736
chrIV	1461519	1462176	chrIV:1461519-1462176	chrIV	1461554	1461555	YDR506C	1	-	chrIV	1461519	1462176	658	*	8.75512	8.23031	9.13912	-0.908811	0.00158886	0.0048561
chrIX	9	303	chrIX:9-303	chrIX	844	845	YIL177W-A	1	+	chrIX	9	303	295	*	7.10008	6.41972	7.56055	-1.14082	0.000149656	0.00064096
chrIX	130037	130129	chrIX:130037-130129	chrIX	130608	130609	YIL122W	1	+	chrIX	130037	130129	93	*	6.1389	5.61523	6.52228	-0.907051	0.00583101	0.0147704
chrIX	332793	332879	chrIX:332793-332879	chrIX	333009	333010	YIL012W	1	+	chrIX	332793	332879	87	*	5.92864	5.40169	6.31377	-0.912075	0.0111603	0.0259476
chrV	61685	62096	chrV:61685-62096	chrV	61697	61698	snR53	1	+	chrV	61685	62096	412	*	8.37047	7.74774	8.80403	-1.05629	0.000232595	0.000928953
chrV	66966	67419	chrV:66966-67419	chrV	66797	66798	YEL047C	1	-	chrV	66966	67419	454	*	7.5916	6.24025	8.27693	-2.03668	2.62372e-10	2.97051e-09
chrV	261373	261746	chrV:261373-261746	chrV	261046	261047	YER053C-A	1	-	chrV	261373	261746	374	*	7.13124	6.78773	7.40849	-0.620754	0.0425812	0.0823358
chrV	441782	442630	chrV:441782-442630	chrV	441819	441820	YER137C	1	-	chrV	441782	442630	849	*	9.65332	8.97128	10.1146	-1.14327	9.6972e-05	0.000447722
chrV	490957	491348	chrV:490957-491348	chrV	491485	491486	YER158W-A	1	+	chrV	490957	491348	392	*	7.33105	6.91625	7.65284	-0.736593	0.0237798	0.049145
chrV	569691	570654	chrV:569691-570654	chrV	569907	569908	YER188C-A	1	-	chrV	569691	570654	964	*	7.94931	7.34781	8.37255	-1.02474	0.00292203	0.00814664
chrV	576710	576856	chrV:576710-576856	chrV	576162	576163	YER190C-B	1	-	chrV	576710	576856	147	*	6.50708	6.02119	6.8699	-0.848711	0.00743498	0.0183117
chrVI	4448	4874	chrVI:4448-4874	chrVI	5064	5065	YFL063W	1	+	chrVI	4448	4874	427	*	7.92626	7.3701	8.32668	-0.956572	0.000981725	0.00319552
chrVI	83856	84063	chrVI:83856-84063	chrVI	82578	82579	YFL026W	1	+	chrVI	83856	84063	208	*	6.47833	3.12902	7.40575	-4.27673	1.29852e-15	2.22458e-14
chrVI	183003	183439	chrVI:183003-183439	chrVI	182861	182862	YFR017C	1	-	chrVI	183003	183439	437	*	7.1829	6.66514	7.56313	-0.897993	0.0044158	0.0117095
chrVII	76632	76685	chrVII:76632-76685	chrVII	76892	76893	YGL225W	1	+	chrVII	76632	76685	54	*	5.73993	5.2581	6.1005	-0.8424	0.0308288	0.0618475
chrVII	166119	166268	chrVII:166119-166268	chrVII	165091	165092	YGL179C	1	-	chrVII	166119	166268	150	*	6.03159	5.53957	6.39781	-0.858248	0.0276823	0.0560534
chrVII	310678	312119	chrVII:310678-312119	chrVII	310965	310966	YGL103W	1	+	chrVII	310678	312119	1442	*	9.97769	9.66509	10.2345	-0.569372	0.0346023	0.0687574
chrVII	371250	371553	chrVII:371250-371553	chrVII	371362	371363	YGL072C	1	-	chrVII	371250	371553	304	*	7.13341	6.67637	7.47997	-0.803606	0.00915361	0.0217482
chrVII	479000	484454	chrVII:479000-484454	chrVII	482666	482667	YGL008C	1	-	chrVII	479000	484454	5455	*	11.8061	9.58402	12.6425	-3.05849	5.3305e-21	1.06774e-19
chrVII	598709	599229	chrVII:598709-599229	chrVII	599415	599416	YGR055W	1	+	chrVII	598709	599229	521	*	7.59805	6.91139	8.06137	-1.14998	0.000141829	0.000621753
chrVII	787128	787178	chrVII:787128-787178	chrVII	786920	786921	YGR147C	1	-	chrVII	787128	787178	51	*	6.45268	6.10488	6.73271	-0.627837	0.0515474	0.0967071
chrVII	828497	829025	chrVII:828497-829025	chrVII	828623	828624	YGR164W	1	+	chrVII	828497	829025	529	*	8.49837	8.03273	8.84983	-0.817103	0.00347631	0.00954885
chrVII	1084219	1084662	chrVII:1084219-1084662	chrVII	1084862	1084863	YGR296W	1	+	chrVII	1084219	1084662	444	*	7.23804	6.75808	7.59757	-0.839494	0.00595698	0.0150019
chrVII	1090765	1090930	chrVII:1090765-1090930	chrVII	1090228	1090229	YGR296C-B	1	-	chrVII	1090765	1090930	166	*	6.54116	6.07578	6.89248	-0.816694	0.0128835	0.0292236
chrVIII	13	251	chrVIII:13-251	chrVIII	809	810	YHL050W-A	1	+	chrVIII	13	251	239	*	7.25039	6.78873	7.59959	-0.810857	0.0124784	0.0285676
chrVIII	34340	36262	chrVIII:34340-36262	chrVIII	36025	36026	YHL033C	1	-	chrVIII	34340	36262	1923	*	10.1542	9.35944	10.6637	-1.30428	1.34196e-06	9.34348e-06
chrVIII	50509	50780	chrVIII:50509-50780	chrVIII	51109	51110	YHL027W	1	+	chrVIII	50509	50780	272	*	6.5411	5.29532	7.19949	-1.90417	6.17129e-09	6.04137e-08
chrVIII	121821	122677	chrVIII:121821-122677	chrVIII	122765	122766	YHR007C-A	1	-	chrVIII	121821	122677	857	*	8.35251	8.04646	8.60486	-0.558402	0.044131	0.0843738
chrVIII	147818	147861	chrVIII:147818-147861	chrVIII	148669	148670	YHR021C	1	-	chrVIII	147818	147861	44	*	6.15391	5.65072	6.52626	-0.875541	0.00953943	0.0225824
chrVIII	381506	381934	chrVIII:381506-381934	chrVIII	381538	381539	snR32	1	+	chrVIII	381506	381934	429	*	7.52762	6.69185	8.0534	-1.36155	0.000239646	0.000945912
chrVIII	388694	389138	chrVIII:388694-389138	chrVIII	388726	388727	YHR144C	1	-	chrVIII	388694	389138	445	*	8.59222	8.06679	8.97654	-0.909745	0.00257584	0.00733862
chrVIII	450661	452875	chrVIII:450661-452875	chrVIII	451153	451154	YHR173C	1	-	chrVIII	450661	452875	2215	*	10.4559	10.1621	10.6999	-0.537825	0.0516328	0.0967279
chrVIII	455638	455939	chrVIII:455638-455939	chrVIII	456589	456590	YHR177W	1	+	chrVIII	455638	455939	302	*	7.16776	6.75639	7.48747	-0.731078	0.0142443	0.031921
chrVIII	549392	549877	chrVIII:549392-549877	chrVIII	549346	549347	YHR214C-B	1	-	chrVIII	549392	549877	486	*	7.97678	7.58122	8.2869	-0.705674	0.014408	0.032177
chrVIII	554059	554167	chrVIII:554059-554167	chrVIII	554394	554395	YHR216W	1	+	chrVIII	554059	554167	109	*	6.12079	5.60579	6.49953	-0.893739	0.0164227	0.0359972
chrVIII	556830	557308	chrVIII:556830-557308	chrVIII	557042	557043	YHR217C	1	-	chrVIII	556830	557308	479	*	8.69069	8.10811	9.10454	-0.996436	0.000387189	0.00140949
chrVIII	562230	562623	chrVIII:562230-562623	chrVIII	561681	561682	YHR219C-A	1	-	chrVIII	562230	562623	394	*	8.37755	7.80829	8.78468	-0.976385	0.000502644	0.00176877
chrX	5	386	chrX:5-386	chrX	827	828	YJL225W-A	1	+	chrX	5	386	382	*	7.09818	6.15972	7.66203	-1.50231	8.17475e-07	6.01329e-06
chrX	73564	74862	chrX:73564-74862	chrX	73785	73786	YJL191W	1	+	chrX	73564	74862	1299	*	9.2947	8.66248	9.7328	-1.07032	0.00104209	0.00335013
chrX	121547	122166	chrX:121547-122166	chrX	122948	122949	YJL158C	1	-	chrX	121547	122166	620	*	8.40097	7.56782	8.92574	-1.35792	8.85099e-05	0.000415377
chrX	139428	140290	chrX:139428-140290	chrX	139691	139692	snR128	1	-	chrX	139428	140290	863	*	8.94479	8.01221	9.50656	-1.49435	5.83459e-07	4.39112e-06
chrX	291107	291347	chrX:291107-291347	chrX	290774	290775	YJL079C	1	-	chrX	291107	291347	241	*	6.88549	6.46295	7.2119	-0.748948	0.0157431	0.0348005
chrX	294444	294755	chrX:294444-294755	chrX	294797	294798	YJL077W-A	1	+	chrX	294444	294755	312	*	6.94186	6.47805	7.29228	-0.814234	0.00691669	0.0171861
chrX	608995	609211	chrX:608995-609211	chrX	609771	609772	YJR095W	1	+	chrX	608995	609211	217	*	7.05418	6.58095	7.40992	-0.828973	0.0182395	0.0391879
chrX	745662	745743	chrX:745662-745743	chrX	745261	745262	YJR162C	1	-	chrX	745662	745743	82	*	5.93539	5.40906	6.3202	-0.911139	0.0118165	0.0272303
chrXI	2	70	chrXI:2-70	chrXI	449	450	YKL225W	1	+	chrXI	2	70	69	*	6.41593	5.82019	6.83633	-1.01614	0.00178739	0.00533758
chrXI	108734	109223	chrXI:108734-109223	chrXI	109267	109268	YKL180W	1	+	chrXI	108734	109223	490	*	7.53778	7.03939	7.9075	-0.868112	0.00431542	0.0115137
chrXI	258609	259820	chrXI:258609-259820	chrXI	258913	258914	YKL097C	1	-	chrXI	258609	259820	1212	*	9.56667	9.22547	9.8424	-0.616932	0.0222327	0.0466136
chrXI	284589	284763	chrXI:284589-284763	chrXI	285028	285029	YKL080W	1	+	chrXI	284589	284763	175	*	6.40774	5.18566	7.05973	-1.87407	0.000415072	0.00150536
chrXI	520706	520837	chrXI:520706-520837	chrXI	521712	521713	YKR043C	1	-	chrXI	520706	520837	132	*	6.60586	4.72878	7.39477	-2.66599	1.40814e-14	2.23585e-13
chrXI	666591	666808	chrXI:666591-666808	chrXI	661440	661441	YKR106W	1	+	chrXI	666591	666808	218	*	8.02905	7.50069	8.41494	-0.914251	0.00149034	0.00458729
chrXII	15	329	chrXII:15-329	chrXII	841	842	YLL067W-A	1	+	chrXII	15	329	315	*	7.76783	7.26294	8.14111	-0.878169	0.00226507	0.00656819
chrXII	5367	5971	chrXII:5367-5971	chrXII	5603	5604	YLL066W-B	1	+	chrXII	5367	5971	605	*	7.88731	7.21001	8.34639	-1.13637	0.000246145	0.000962406
chrXII	10876	11451	chrXII:10876-11451	chrXII	11724	11725	YLL065W	1	+	chrXII	10876	11451	576	*	8.92817	8.3369	9.34635	-1.00945	0.000514442	0.0018054
chrXII	36981	37166	chrXII:36981-37166	chrXII	36361	36362	YLL052C	1	-	chrXII	36981	37166	186	*	6.53325	5.9683	6.93818	-0.969888	0.0025025	0.00716099
chrXII	198521	199383	chrXII:198521-199383	chrXII	198782	198783	snR30	1	+	chrXII	198521	199383	863	*	8.43451	7.83302	8.85775	-1.02473	0.000500699	0.00176669
chrXII	201593	202242	chrXII:201593-202242	chrXII	201315	201316	YLR028C	1	-	chrXII	201593	202242	650	*	8.45248	8.07913	8.74881	-0.669678	0.0172561	0.0373834
chrXII	232096	234874	chrXII:232096-234874	chrXII	234081	234082	YLR044C	1	-	chrXII	232096	234874	2779	*	10.864	9.98074	11.4079	-1.42711	3.34284e-07	2.57537e-06
chrXII	390521	390715	chrXII:390521-390715	chrXII	390270	390271	YLR121C	1	-	chrXII	390521	390715	195	*	6.83781	6.36322	7.19433	-0.831118	0.016572	0.0362477
chrXII	451283	452200	chrXII:451283-452200	chrXII	452436	452437	YLR154W-A	1	+	chrXII	451283	452200	918	*	13.9668	9.93297	14.9221	-4.98912	0.00140332	0.00433995
chrXII	453155	453611	chrXII:453155-453611	chrXII	452436	452437	YLR154W-A	1	+	chrXII	453155	453611	457	*	13.7761	-0.179582	14.7761	-14.9557	1.809e-144	3.92554e-142
chrXII	454162	454746	chrXII:454162-454746	chrXII	454390	454391	YLR154W-B	1	+	chrXII	454162	454746	585	*	14.0657	-0.179582	15.0657	-15.2453	2.55013e-150	8.30067e-148
chrXII	455850	457454	chrXII:455850-457454	chrXII	455881	455882	YLR154W-F	1	+	chrXII	455850	457454	1605	*	15.2646	-0.179582	16.2646	-16.4442	2.48971e-168	3.2416e-165
chrXII	461669	462775	chrXII:461669-462775	chrXII	462671	462672	YLR154C-G	1	-	chrXII	461669	462775	1107	*	14.8039	-0.179582	15.8038	-15.9834	2.12767e-160	9.23407e-158
chrXII	468928	469059	chrXII:468928-469059	chrXII	468958	468959	YLR154C-H	1	-	chrXII	468928	469059	132	*	8.65862	5.36051	9.58335	-4.22284	3.39308e-05	0.000179585
chrXII	490488	490817	chrXII:490488-490817	chrXII	490404	490405	YLR162W-A	1	+	chrXII	490488	490817	330	*	8.52012	4.05432	9.4871	-5.43278	2.9559e-11	3.73648e-10
chrXII	637279	638528	chrXII:637279-638528	chrXII	636778	636779	YLR249W	1	+	chrXII	637279	638528	1250	*	8.92464	-0.179582	9.92333	-10.1029	5.93435e-65	4.82908e-63
chrXII	639854	640195	chrXII:639854-640195	chrXII	640315	640316	YLR250W	1	+	chrXII	639854	640195	342	*	7.41755	6.12084	8.08925	-1.96841	1.04802e-08	1.00332e-07
chrXII	673722	674300	chrXII:673722-674300	chrXII	673944	673945	YLR264C-A	1	-	chrXII	673722	674300	579	*	8.19083	7.79802	8.49926	-0.701243	0.026044	0.0533164
chrXII	837578	839649	chrXII:837578-839649	chrXII	839253	839254	YLR355C	1	-	chrXII	837578	839649	2072	*	10.5573	9.99675	10.96	-0.963228	0.00049283	0.00174365
chrXII	898756	899250	chrXII:898756-899250	chrXII	899178	899179	snR34	1	+	chrXII	898756	899250	495	*	7.70055	6.87132	8.22379	-1.35246	1.62504e-05	9.04191e-05
chrXII	928294	928332	chrXII:928294-928332	chrXII	928741	928742	YLR404W	1	+	chrXII	928294	928332	39	*	5.31773	4.23257	5.93	-1.69743	0.024145	0.0496631
chrXII	1065023	1065507	chrXII:1065023-1065507	chrXII	1065954	1065955	YLR462W	1	+	chrXII	1065023	1065507	485	*	7.78642	7.13815	8.23209	-1.09394	0.000145532	0.000631009
chrXII	1071410	1071977	chrXII:1071410-1071977	chrXII	1071710	1071711	YLR466C-B	1	-	chrXII	1071410	1071977	568	*	8.14156	7.64206	8.51189	-0.869828	0.00280856	0.00789794
chrXIII	0	297	chrXIII:0-297	chrXIII	825	826	YML133W-B	1	+	chrXIII	0	297	298	*	7.83387	7.3039	8.2206	-0.916692	0.00177703	0.00531883
chrXIII	5203	5563	chrXIII:5203-5563	chrXIII	4684	4685	YML133C	1	-	chrXIII	5203	5563	361	*	7.02012	6.47834	7.41308	-0.934741	0.00196943	0.00585432
chrXIII	147214	147309	chrXIII:147214-147309	chrXIII	146480	146481	YML063W	1	+	chrXIII	147214	147309	96	*	6.4943	5.84052	6.94256	-1.10204	0.00127331	0.00399483
chrXIII	226521	226933	chrXIII:226521-226933	chrXIII	225887	225888	YML024W	1	+	chrXIII	226521	226933	413	*	7.6591	7.30908	7.94057	-0.631496	0.0478844	0.0904357
chrXIII	296864	298785	chrXIII:296864-298785	chrXIII	297276	297277	snR78	1	+	chrXIII	296864	298785	1922	*	10.0508	9.4289	10.4839	-1.05505	0.000241951	0.000951724
chrXIII	302648	303047	chrXIII:302648-303047	chrXIII	302485	302486	YMR015C	1	-	chrXIII	302648	303047	400	*	7.51875	7.18124	7.79207	-0.610833	0.0418117	0.0810102
chrXIII	553011	553174	chrXIII:553011-553174	chrXIII	553360	553361	YMR144W	1	+	chrXIII	553011	553174	164	*	7.03828	6.59514	7.37682	-0.781679	0.00882853	0.021169
chrXIII	556825	557382	chrXIII:556825-557382	chrXIII	556475	556476	YMR145C	1	-	chrXIII	556825	557382	558	*	7.52801	7.20403	7.79241	-0.588371	0.0431204	0.0828065
chrXIII	661674	662194	chrXIII:661674-662194	chrXIII	662642	662643	YMR199W	1	+	chrXIII	661674	662194	521	*	7.51184	6.94322	7.91864	-0.975424	0.000955046	0.00313216
chrXIII	924047	924389	chrXIII:924047-924389	chrXIII	923802	923803	YMR326C	1	-	chrXIII	924047	924389	343	*	6.78543	5.88519	7.33554	-1.45036	0.000772272	0.00259149
chrXIV	8	292	chrXIV:8-292	chrXIV	732	733	YNL339W-B	1	+	chrXIV	8	292	285	*	7.07879	6.12159	7.6492	-1.52761	2.67632e-06	1.78696e-05
chrXIV	6357	7069	chrXIV:6357-7069	chrXIV	6559	6560	YNL338W	1	+	chrXIV	6357	7069	713	*	7.7058	7.03434	8.16222	-1.12789	0.00242465	0.00696885
chrXIV	88904	89950	chrXIV:88904-89950	chrXIV	89208	89209	snR40	1	+	chrXIV	88904	89950	1047	*	8.73105	8.15094	9.14366	-0.992711	0.00285355	0.00798994
chrXIV	96137	96427	chrXIV:96137-96427	chrXIV	96171	96172	YNL285W	1	+	chrXIV	96137	96427	291	*	8.04452	7.26497	8.54782	-1.28285	5.06534e-05	0.00025172
chrXIV	359330	359390	chrXIV:359330-359390	chrXIV	359594	359595	YNL141W	1	+	chrXIV	359330	359390	61	*	8.09607	7.62928	8.44817	-0.818886	0.00506369	0.0130553
chrXIV	441053	441085	chrXIV:441053-441085	chrXIV	440919	440920	YNL097C-B	1	-	chrXIV	441053	441085	33	*	5.11014	4.65046	5.4582	-0.80774	0.0360457	0.0708936
chrXIV	499509	501411	chrXIV:499509-501411	chrXIV	499679	499680	YNL067W	1	+	chrXIV	499509	501411	1903	*	10.197	9.80115	10.5073	-0.706184	0.0113025	0.0261847
chrXIV	502797	503507	chrXIV:502797-503507	chrXIV	503722	503723	YNL065W	1	+	chrXIV	502797	503507	711	*	8.14681	7.7554	8.45438	-0.698975	0.01682	0.0365999
chrXIV	716053	716527	chrXIV:716053-716527	chrXIV	716118	716119	snR49	1	+	chrXIV	716053	716527	475	*	7.33941	6.25334	7.95195	-1.69862	0.00243276	0.00697676
chrXIV	784031	784310	chrXIV:784031-784310	chrXIV	783541	783542	YNR077C	1	-	chrXIV	784031	784310	280	*	8.44763	7.85684	8.86557	-1.00872	0.000452514	0.00161861
chrXV	4	125	chrXV:4-125	chrXV	583	584	YOL166W-A	1	+	chrXV	4	125	122	*	7.45283	6.9094	7.84665	-0.937256	0.00342155	0.0094483
chrXV	91733	92373	chrXV:91733-92373	chrXV	91419	91420	YOL122C	1	-	chrXV	91733	92373	641	*	7.98593	7.51714	8.33917	-0.822031	0.00588534	0.0148502
chrXV	300991	301332	chrXV:300991-301332	chrXV	301045	301046	YOL013W-A	1	+	chrXV	300991	301332	342	*	8.25627	7.44616	8.77194	-1.32578	1.01073e-05	5.9546e-05
chrXV	391499	391999	chrXV:391499-391999	chrXV	392174	392175	YOR032W-A	1	+	chrXV	391499	391999	501	*	7.51031	7.14643	7.80064	-0.654206	0.02794	0.0563125
chrXV	407983	408208	chrXV:407983-408208	chrXV	408134	408135	snR9	1	-	chrXV	407983	408208	226	*	6.69778	6.23922	7.0452	-0.805981	0.0127763	0.0290817
chrXV	424234	424701	chrXV:424234-424701	chrXV	424617	424618	YOR050C	1	-	chrXV	424234	424701	468	*	7.56892	6.94153	8.00471	-1.06318	0.000880483	0.00292446
chrXV	779292	780841	chrXV:779292-780841	chrXV	779405	779406	YOR234C	1	-	chrXV	779292	780841	1550	*	9.88067	9.50919	10.1758	-0.666631	0.017786	0.0384036
chrXV	903739	904493	chrXV:903739-904493	chrXV	904456	904457	YOR314W-A	1	+	chrXV	903739	904493	755	*	8.19593	7.77171	8.52335	-0.75164	0.0214953	0.0453596
chrXV	1027964	1028974	chrXV:1027964-1028974	chrXV	1028625	1028626	YOR369C	1	-	chrXV	1027964	1028974	1011	*	8.97113	8.34813	9.40482	-1.05668	0.000146848	0.000631009
chrXV	1084577	1084882	chrXV:1084577-1084882	chrXV	1084369	1084370	YOR394C-A	1	-	chrXV	1084577	1084882	306	*	7.19337	6.52742	7.64725	-1.11983	0.00017381	0.000723004
chrXV	1090979	1091291	chrXV:1090979-1091291	chrXV	1090497	1090498	YOR396C-A	1	-	chrXV	1090979	1091291	313	*	7.74609	7.20236	8.14007	-0.937712	0.00157284	0.00482981
chrXVI	6314	6696	chrXVI:6314-6696	chrXVI	6007	6008	YPL283C	1	-	chrXVI	6314	6696	383	*	7.00334	6.41295	7.42108	-1.00813	0.00263633	0.00746195
chrXVI	404172	406699	chrXVI:404172-406699	chrXVI	404948	404949	YPL081W	1	+	chrXVI	404172	406699	2528	*	10.144	9.78522	10.431	-0.645809	0.0159395	0.035175
chrXVI	555681	556302	chrXVI:555681-556302	chrXVI	556375	556376	YPR001W	1	+	chrXVI	555681	556302	622	*	8.41053	8.0641	8.68967	-0.625568	0.0352364	0.0697546
chrXVI	700156	702129	chrXVI:700156-702129	chrXVI	700592	700593	YPR080W	1	+	chrXVI	700156	702129	1974	*	10.6781	10.2614	11.001	-0.739558	0.00772757	0.0189122
chrXVI	744150	744498	chrXVI:744150-744498	chrXVI	744173	744174	YPR108W-A	1	+	chrXVI	744150	744498	349	*	8.23582	7.67475	8.63876	-0.964016	0.000657893	0.00223369
chrXVI	810249	810900	chrXVI:810249-810900	chrXVI	810269	810270	YPR137C-A	1	-	chrXVI	810249	810900	652	*	8.43479	8.01605	8.75893	-0.742876	0.0108351	0.0253274
chrXVI	927693	928092	chrXVI:927693-928092	chrXVI	928294	928295	YPR195C	1	-	chrXVI	927693	928092	400	*	6.63522	5.62856	7.2224	-1.59383	9.44108e-07	6.73065e-06
chrXVI	947802	948044	chrXVI:947802-948044	chrXVI	947338	947339	YPR204C-A	1	-	chrXVI	947802	948044	243	*	6.73787	6.12065	7.16877	-1.04812	0.00472767	0.0123355
