# Supplementary material for: Histone H3 threonine 11 phosphorylation by Sch9 and CK2 regulates chronological lifespan by controlling the nutritional stress response
Source: eLife. 2018 Jun 25;7:e36157. doi: 10.7554/eLife.36157 (PMC6042962; doi:10.7554/eLife.36157)
Supplement: Figure 2—source data 1. [file elife-36157-fig2-data1.xlsx]

## Sheet: Gene lists used in Figure 2
Glucose fermentation
HXK2/YGL253W
PGI1/YBR196C
PFK1/YGR240C
PFK2/YMR205C
FBA1/YKL060C
TPI1/YDR050C
TDH1/YJL052W
TDH3/YGR192C
PGK1/YCR012W
GPM1/YKL152C
GPM2/YDL021W
GPM3/YOL056W
ENO1/YGR254W
ENO2/YHR174W
ERR1/2/3
PYK2/YOR347C
CDC19/YAL038W
PDC1/YLR044C
PDC5/YLR134W
PDC6/YGR087C
ADH1/YOL086C
Gluconeogenesis only
FBP1/YLR377C
PCK1/YKR097W
MDH2/YOL126C
PYC1/YGL062W
PYC2/YBR218C
MAE1/YKL029C
TCA cycles
PYC1/YGL062W
PYC2/YBR218C
CIT1/YNR001C
CIT2/YCR005C
CIT3/YPR001W
ACO1/YLR304C
ACO2/YJL200C
ACO1/YLR304C
IDH1/YNL037C
IDH2/YOR136W
KGD1/YIL125W
KGD2/YDR148C
LSC1/YOR142W
LSC2/YGR244C
SDH1/YKL148C
SDH2/YLL041C
SDH3/YKL141W
SDH4/YDR178W
FUM1/YPL262W
MDH1/YKL085W
MDH2/YOL126C
Oxidative phosphorylation
NDE1/YMR145C
NDE2/YDL085W
complexIII
COR1/YBL045C
QCR2/YPR191W
QCR6/YFR033C
QCR7/YDR529C
QCR8/YJL166W
QCR9/YGR183C
QCR10/YHR001W-a
CYC1/YJR048W
CYC7/YEL039C
complexIV
COX4/YGL187C
COX5A/YNL052W
COX5B/YIL111W
COX6/YHR051W
COX7/YMR256C
COX8/YLR395C
COX9/YDL067C
COX12/YLR038C
COX13/YGL191W
complexV
ATP1/YBL099W
ATP2/YJR121W
ATP3/YBR039W
ATP4/YPL078C
ATP5/YDR298C
ATP7/YKL016C
ATP10/YLR393W
ATP11/YNL315C
ATP12/YJL180C
ATP14/YLR295C
ATP15/YPL271W
ATP16/YDL004W
ATP17/YDR377W
ATP20/YPR020W
ADP/ATP translocator
AAC1/YMR056C
AAC2/YBL030C
AAC3/YBR085W
Cytosolic ribosomal subunit
cytosolic large ribosomal subunit
RPL1A/YPL220W
RPL1B/YGL135W
RPL2A/YFR031C-A
RPL2B/YIL018W
RPL3/YOR063W
RPL4A/YBR031W
RPL4B/YDR012W
RPL5/YPL131W
RPL6A/YML073C
RPL6B/YLR448W
RPL7A/YGL076C
RPL7B/YPL198W
RPL8A/YHL033C
RPL8B/YLL045C
RPL9A/YGL147C
RPL9B/YNL067W
RPL10/YLR075W
RPL11A/YPR102C
RPL11B/YGR085C
RPL12A/YEL054C
RPL12B/YDR418W
RPL13A/YDL082W
RPL13B/YMR142C
RPL14A/YKL006W
RPL14B/YHL001W
RPL15A/YLR029C
RPL15B/YMR121C
RPL16A/YIL133C
RPL16B/YNL069C
RPL17A/YKL180W
RPL17B/YJL177W
RPL18A/YOL120C
RPL18B/YNL301C
RPL19A/YBR084C-A
RPL19B/YBL027W
RPL20A/YMR242C
RPL20B/YOR312C
RPL21A/YBR191W
RPL21B/YPL079W
RPL22A/YLR061W
RPL22B/YFL034C-A
RPL23A/YBL087C
RPL23B/YER117W
RPL24A/YGL031C
RPL24B/YGR148C
RPL25/YOL127W
RPL26A/YLR344W
RPL26B/YGR034W
RPL27A/YHR010W
RPL27B/YDR471W
RPL28/YGL103W
RPL29/YFR032C-A
RPL30/YGL030W
RPL31A/YDL075W
RPL31B/YLR406C
RPL32/YBL092W
RPL33A/YPL143W
RPL33B/YOR234C
RPL34A/YER056C-A
RPL34B/YIL052C
RPL35A/YDL191W
RPL35B/YDL136W
RPL36A/YMR194W
RPL36B/YPL249C-A
RPL37A/YLR185W
RPL37B/YDR500C
RPL38/YLR325C
RPL39/YJL189W
RPL40A/YIL148W
RPL40B/YKR094C
RPL41A/YDL184C
RPL41B/YDL133C-A
RPL42A/YNL162W
RPL42B/YHR141C
RPL43A/YPR043W
RPL43B/YJR094W-A
RPP0/YLR340W
RPP1A/YDL081C
RPP1B/YDL130W
RPP2A/YOL039W
RPP2B/YDR382W
cytosolic small ribosomal subunit
ASC1/YMR116C
FUN12/YAL035W
RPS0A/YGR214W
RPS0B/YLR048W
RPS1A/YLR441C
RPS1B/YML063W
RPS2/YGL123W
RPS3/YNL178W
RPS4A/YJR145C
RPS4B/YHR203C
RPS5/YJR123W
RPS6A/YPL090C
RPS6B/YBR181C
RPS7A/YOR096W
RPS7B/YNL096C
RPS8A/YBL072C
RPS8B/YER102W
RPS9A/YPL081W
RPS9B/YBR189W
RPS10A/YOR293W
RPS10B/YMR230W
RPS11A/YDR025W
RPS11B/YBR048W
RPS12/YOR369C
RPS13/YDR064W
RPS14A/YCR031C
RPS14B/YJL191W
RPS15/YOL040C
RPS16A/YMR143W
RPS16B/YDL083C
RPS17A/YML024W
RPS17B/YDR447C
RPS18A/YDR450W
RPS18B/YML026C
RPS19A/YOL121C
RPS19B/YNL302C
RPS20/YHL015W
RPS21A/YKR057W
RPS21B/YJL136C
RPS22A/YJL190C
RPS22B/YLR367W
RPS23A/YGR118W
RPS23B/YPR132W
RPS24A/YER074W
RPS24B/YIL069C
RPS25A/YGR027C
RPS25B/YLR333C
RPS26A/YGL189C
RPS26B/YER131W
RPS27A/YKL156W
RPS27B/YHR021C
RPS28A/YOR167C
RPS28B/YLR264W
RPS29A/YLR388W
RPS29B/YDL061C
RPS30A/YLR287C-A
RPS30B/YOR182C
RPS31/YLR167W
SIS1/YNL007C
Mitochondrial ribosomal subunit
mitochondrial large ribosomal subunit
IMG1/YCR046C
IMG2/YCR071C
MRP20/YDR405W
MRP49/YKL167C
MRP7/YNL005C
MRP21/YBL090W
MRP51/YPL118W
MRPL1/YDR116C
MRPL3/YMR024W
MRPL4/YLR439W
MRPL6/YHR147C
MRPL7/YDR237W
MRPL8/YJL063C
MRPL9/YGR220C
MRPL10/YNL284C
MRPL11/YDL202W
MRPL13/YKR006C
MRPL15/YLR312W-A
MRPL16/YBL038W
MRPL17/YNL252C
MRPL19/YNL185C
MRPL20/YKR085C
MRPL22/YNL177C
MRPL23/YOR150W
MRPL24/YMR193W
MRPL25/YGR076C
MRPL27/YBR282W
MRPL28/YDR462W
MRPL31/YKL138C
MRPL32/YCR003W
MRPL33/YMR286W
MRPL35/YDR322W
MRPL36/YBR122C
MRPL37/YBR268W
MRPL38/YKL170W
MRPL39/YML009C
MRPL40/YPL173W
MRPL44/YMR225C
MRPL49/YJL096W
MRPL50/YNR022C
MRPL51/YPR100W
RML2/YEL050C
YML6/YML025C
YDR115W
YPL183W-A
mitochondrial small ribosomal subunit
MRP1/YDR347W
MRP2/YPR166C
MRP4/YHL004W
MRP10/YDL045W-A
MRP13/YGR084C
MRP17/YKL003C
MRPS5/YBR251W
MRPS8/YMR158W
MRPS9/YBR146W
MRPS16/YPL013C
MRPS17/YMR188C
MRPS18/YNL306W
MRPS28/YDR337W
MRPS35/YGR165W
NAM9/YNL137C
PET123/YOR158W
PPE1/YHR075C
RSM7/YJR113C
RSM10/YDR041W
RSM18/YER050C
RSM19/YNR037C
RSM22/YKL155C
RSM23/YGL129C
RSM24/YDR175C
RSM25/YIL093C
RSM26/YJR101W
RSM27/YGR215W
RSM28/YDR494W
SWS2/YNL081C
YMR31/YFR049W
YNR036C
Response to heat
TPS1/YBR126C
MRK1/YDL079C
LSP1/YPL004C
GAC1/YOR178C
DDR2/YOL052C-A
HSP82/YPL240C
HSP104/YLL026W
NUP100/YKL068W
PIL1/YGR086C
MDJ1/YFL016C
NCB2/YDR397C
GLC7/YER133W
HSP78/YDR258C
AHA1/YDR214W
TPS2/YDR074W
Chronological aging
TEC1/YBR083W
SIR2/YDL042C
GIS1/YDR096W
GCN2/YDR283C
ACT1/YFL039C
ACB1/YGR037C
NQM1/YGR043C
VHR1/YIL056W
FIS1/YIL065C
TOR1/YJR066W
AIM25/YJR100C
MDH1/YKL085W
AAT1/YKL106W
DNM1YLL001W
ALT1/YLR089C
MDM30/YLR368W
TRM9/YML014W
NDI1/YML120C
PGA3/YML125C
NDE1/YMR145C
CKA2/YOR061W
SCP1/YOR367W
HST2/YPL015C
Response to oxidative stress
GPX2/YBR244W
MXR2/YCL033C
YDR222W
CTA1/YDR256C
SVF1/YDR346C
SDH7/YDR511W
YER190C-A
YFL067W
CTT1/YGR088W
YGR296C-A
HYR1/YIR037W
GPX1/YKL026C
CCP1/YKR066C
YLR225C
YML133W-A
YNL339W-A
YPL283W-A
