# Supplementary material for: Histone H3 threonine 11 phosphorylation by Sch9 and CK2 regulates chronological lifespan by controlling the nutritional stress response
Source: eLife. 2018 Jun 25;7:e36157. doi: 10.7554/eLife.36157 (PMC6042962; doi:10.7554/eLife.36157)
Supplement: Figure 5—source data 1. [file elife-36157-fig5-data1.xlsx]

## Sheet: Figure 5A CLS
CFU (%)	YBL TRP						T11A
Day	#1	#2	#3	WT	std		#1	#2	#3	T11A	std
3	102.465	90.8451	106.69	100	8.20506		97.2973	97.2973	105.405	100	4.68122
5	87.6761	72.8873	79.2254	79.9296	7.41947		101.351	86.4865	100	95.9459	8.21995
7	32.7465	29.5775	47.5352	36.6197	9.58497		101.351	100	94.5946	98.6486	3.57534
9	8.4507	17.9577	27.4648	17.9577	9.50704		81.0811	83.7838	78.3784	81.0811	2.7027
11	2.11268	5.28169	5.28169	4.22535	1.82963		74.3243	47.2973	62.1622	61.2613	13.536
15	9.50704	0	3.16901	4.22535	4.84075		70.2703	54.0541	50	58.1081	10.726
19							62.1622	31.0811	45.9459	46.3964	15.5454
25							48.6486	41.8919	45.9459	45.4955	3.40083
29							54.0541	47.2973	31.0811	44.1441	11.8066
31							37.8378	43.2432	41.8919	40.991	2.81306
33							40.5405	39.1892	27.027	35.5856	7.44266
37							32.4324	29.7297	32.4324	31.5315	1.56041
40							32.4324	29.7297	21.6216	27.9279	5.62612
42							20.2703	20.2703	21.6216	20.7207	0.780203
44							24.3243	6.75676	12.1622	14.4144	8.99774

## Sheet: Figure 5B CLS
CFU (%)	WT(BY4742)						cka1Δ
Day	#1	#2	#3	WT	std		#1	#2	#3	cka1Δ	std
3	96.31	107.38	96.31	100	6.39133		102.09	93.1343	104.776	100	6.09569
5	92.9889	84.1328	94.0959	90.4059	5.46076		90.4478	94.9254	87.7612	91.0448	3.61921
7	75.2768	75.2768	67.5277	72.6937	4.47393		73.4328	74.3284	98.5075	82.0896	14.2254
9	38.7454	44.2804	43.1734	42.0664	2.92888		88.6567	81.4925	83.2836	84.4776	3.72836
11	32.1033	26.5683	32.1033	30.2583	3.19567		74.3284	84.1791	81.4925	80	5.09216
15	4.42804	4.42804	6.64207	5.16605	1.27827		75.2239	75.2239	74.3284	74.9254	0.51703
17	1.10701	0	7.74908	2.95203	4.19108		56.4179	76.1194	61.791	64.7761	10.1843
21	2.21402	1.10701	7.74908	3.69004	3.55854		41.194	33.1343	50.1493	41.4925	8.51139
23							32.2388	49.2537	40.2985	40.597	8.51139
25							42.9851	38.5075	41.194	40.8955	2.25368
29							41.194	34.9254	41.194	39.1045	3.61921
33							22.3881	17.0149	25.9701	21.791	4.50736
35							19.7015	17.0149	30.4478	22.3881	7.10799
37							20.597	20.597	25.0746	22.0896	2.58515
39							7.16418	8.95522	3.58209	6.56716	2.73587

## Sheet: Figure 5C CLS
CFU(%)	WT(BY4742)						cka1Δ						sch9Δ						sch9Δcka1Δ
day	#1	#2	#3	WT	STD		#1	#2	#3	cka1Δ			#1	#2	#3	sch9			#1	#2	#3	sch9cka1
3	115.068	102.74	82.1918	100	13.561		95.5912	114.228	90.1804	100	10.3007		114.583	85.4167	87.5	100	11.7851		78.0142	92.1986	125.887	100	18.3097
6	78.9041	86.3014	82.1918	82.4658	3.02613		78.7575	79.9599	79.3587	79.3587	0.49088		93.75	139.583	77.0833	105.833	22.3762		79.7872	111.702	108.156	92.1986	14.7636
8	64.1096	67.3973	75.6164	69.0411	4.83932		70.9419	73.3467	69.7395	71.3427	1.49966		54.1667	104.167	81.25	90.9722	18.8526		70.922	104.61	83.3333	93.2624	14.2992
13	13.1507	27.1233	14.7945	18.3562	6.23551		52.9058	51.7034	57.1142	53.9078	2.31981		95.8333	85.4167	50	77.0833	19.6173		88.6525	111.702	86.8794	95.7447	15.4373
15	5.75342	10.6849	9.0411	8.49315	2.05022		50.501	40.2806	53.507	48.0962	5.6611		70.8333	85.4167	66.6667	74.3056	8.03878		54.9645	120.567	62.0567	79.1962	22.7848
19							33.6673	40.2806	42.6854	38.8778	3.81289		0	39.5833	10.4167	16.6667	16.7532		0	74.4681	21.2766	31.9149	31.3183
