# Supplementary material for: Histone H3 threonine 11 phosphorylation by Sch9 and CK2 regulates chronological lifespan by controlling the nutritional stress response
Source: eLife. 2018 Jun 25;7:e36157. doi: 10.7554/eLife.36157 (PMC6042962; doi:10.7554/eLife.36157)
Supplement: Figure 6—source data 1. [file elife-36157-fig6-data1.xlsx]

## Sheet: Figure 6C CLS
		Day	#1	#2	#3	H3WT unbuffered	STD		#1	#2	#3	T11A unbuffered	STD		#1	#2	#3	H3WT buffered	STD		#1	#2	#3	T11A buffered	STD
		3	87.1369	108.299	104.564	100	11.2952		106.8	85.2	108	100	12.8312		93.1034	116.379	90.5172	100	14.2437		80.9524	117.46	101.587	100	18.3057
		6	56.0166	60.9959	52.2822	56.4315	4.37164		73.2	82.8	110.4	88.8	19.3122		90.5172	90.5172	102.155	94.3966	6.71916		85.7143	88.8889	92.0635	88.8889	3.1746
		10	9.95851	7.46888	7.46888	8.29876	1.43739		40.8	54	70.8	55.2	15.036		96.9828	82.7586	94.3966	91.3793	7.57689		84.127	87.3016	104.762	92.0635	11.1111
		13	0	0	0	0	0		33.6	44.4	44.4	40.8	6.23538		71.1207	72.4138	94.3966	79.3103	13.081			88.8889	85.7143	87.3016	2.24478
		17							45.6	33.6	43.2	40.8	6.3498		77.5862	87.931	71.1207	78.8793	8.47945		95.2381	79.3651	98.4127	91.0053	10.2049
