# Supplementary material for: Histone H3 threonine 11 phosphorylation by Sch9 and CK2 regulates chronological lifespan by controlling the nutritional stress response
Source: eLife. 2018 Jun 25;7:e36157. doi: 10.7554/eLife.36157 (PMC6042962; doi:10.7554/eLife.36157)
Supplement: Supplementary file 1. [file elife-36157-supp1.xlsx]

## Sheet: Yeast strains
Yeast strains used in this study
Name	Genotype	Source
YBL574	MATa leu2Δ1, his3Δ200, ura3-52, trp1Δ63, lys2-128δ, (hht1-hhf1)ΔLEU2(hht2-hhf2)Δ::HIS3 Ty912Δ35-lacZ::his4, {pDM9-HHT1-HHF1-URA3}	F. Winston
ySE40	MATa leu2Δ1, his3Δ200, ura3-52, trp1Δ63, lys2-128δ, (hht1-hhf1)ΔLEU2(hht2-hhf2)Δ::HIS3 Ty912Δ35-lacZ::his4, {pWZ414-HHT2-HHF2-TRP1}	Nakanishi et al., 2008
H3T11A	MATa leu2Δ1, his3Δ200, ura3-52, trp1Δ63, lys2-128δ, (hht1-hhf1)ΔLEU2(hht2-hhf2)Δ::HIS3 Ty912Δ35-lacZ::his4, {pWZ414-HHT2(T11A)-HHF2-TRP1}	Nakanishi et al., 2008
BY4741	MATa his3Δ1 leu2Δ0 met15Δ0 ura3Δ0	Open Biosystems
BY4742	MATalpha his3Δ1 leu2Δ0 met15Δ0 ura3Δ0	Open Biosystems
ySE18	MATa his3Δ1 leu2Δ0 met15Δ0 ura3Δ0 cka1Δ::KanMX4	Open Biosystems
ySE19	MATa his3Δ1 leu2Δ0 met15Δ0 ura3Δ0 cka2Δ::KanMX4	Open Biosystems
ySE20	MATa his3Δ1 leu2Δ0 met15Δ0 ura3Δ0 cka1-TAP::HIS3	Open Biosystems
ySE32	MATa his3Δ1 leu2Δ0 met15Δ0 ura3Δ0 ckb1Δ::KanMX4	Open Biosystems
ySE33	MATa his3Δ1 leu2Δ0 met15Δ0 ura3Δ0 ckb2Δ::KanMX4	Open Biosystems
ySE03	MATa his3Δ1 leu2Δ0 met15Δ0 ura3Δ0 sam1Δ::KanMX4	Open Biosystems
ySE04	MATa his3Δ1 leu2Δ0 met15Δ0 ura3Δ0 shm2Δ::KanMX4	Open Biosystems
ySE05	MATa his3Δ1 leu2Δ0 met15Δ0 ura3Δ0 ser33Δ::KanMX4	Open Biosystems
ySE06	MATa his3Δ1 leu2Δ0 met15Δ0 ura3Δ0 cdc19-1	Open Biosystems
ySH1075	MATa his3Δ1 leu2Δ0 met15Δ0 ura3Δ0 sch9Δ::KanMX4	Open Biosystems
ySH1076	MATa his3Δ1 leu2Δ0 met15Δ0 ura3Δ0 tor1Δ::KanMX4	Open Biosystems
ySH1077	MATa his3Δ1 leu2Δ0 met15Δ0 ura3Δ0 ras2Δ::KanMX4	Open Biosystems
ySH1086	MATa his3Δ1 leu2Δ0 met15Δ0 ura3Δ0 sch9Δ::KanMX4 cka1Δ::HIS3	In this study
ySH1142	MATa his3Δ1 leu2Δ0 met15Δ0 ura3Δ0 bub1Δ::KanMX4	Open Biosystems
ySH1143	MATa his3Δ1 leu2Δ0 met15Δ0 ura3Δ0 chk1Δ::KanMX4	Open Biosystems
ySH1134	MATa his3Δ1 leu2Δ0 met15Δ0 ura3Δ0 Mek1Δ::KanMX4	Open Biosystems
ySH1092	MATalpha his3Δ1 leu2Δ0 met15Δ0 ura3Δ0 cka1Δ::KanMX4	Open Biosystems
ySH1110	MATalpha his3Δ1 leu2Δ0 met15Δ0 ura3Δ0 sch9Δ::KanMX4	Open Biosystems
ySH1111	MATalpha his3Δ1 leu2Δ0 met15Δ0 ura3Δ0 sch9Δ::KanMX4 cka1Δ::NatMX6	In this study
ySH2185	MATalpha his3Δ1 leu2Δ0 met15Δ0 ura3Δ0 Cka1-V5::KanMX6	In this study
ySH2187	MATalpha his3Δ1 leu2Δ0 met15Δ0 ura3Δ0 Sch9-V5::KanMX6	In this study
