# Supplementary figures and images for: Histone H3 threonine 11 phosphorylation by Sch9 and CK2 regulates chronological lifespan by controlling the nutritional stress response
Source: eLife journal article supplement (doi:10.7554/elife.36157), 2018-06-25

Figure 5- figure supplement 1

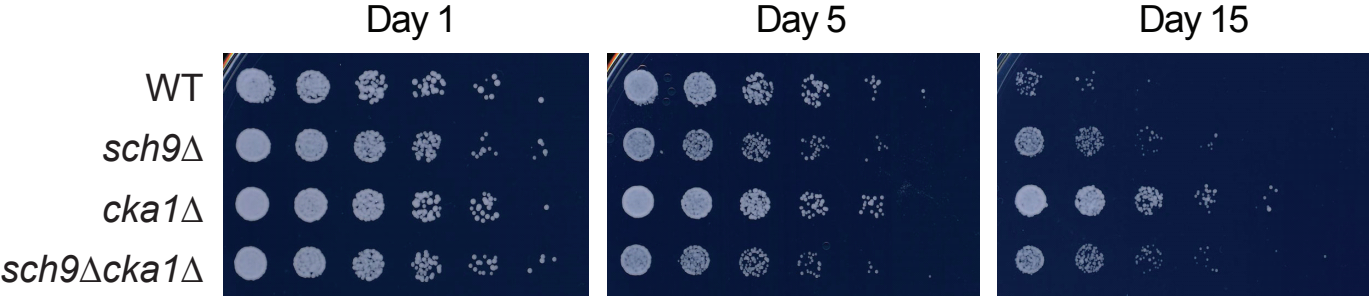

Supplement: supp [file elife-36157-supp-v1.zip]

Figure 2- figure supplement 1

A

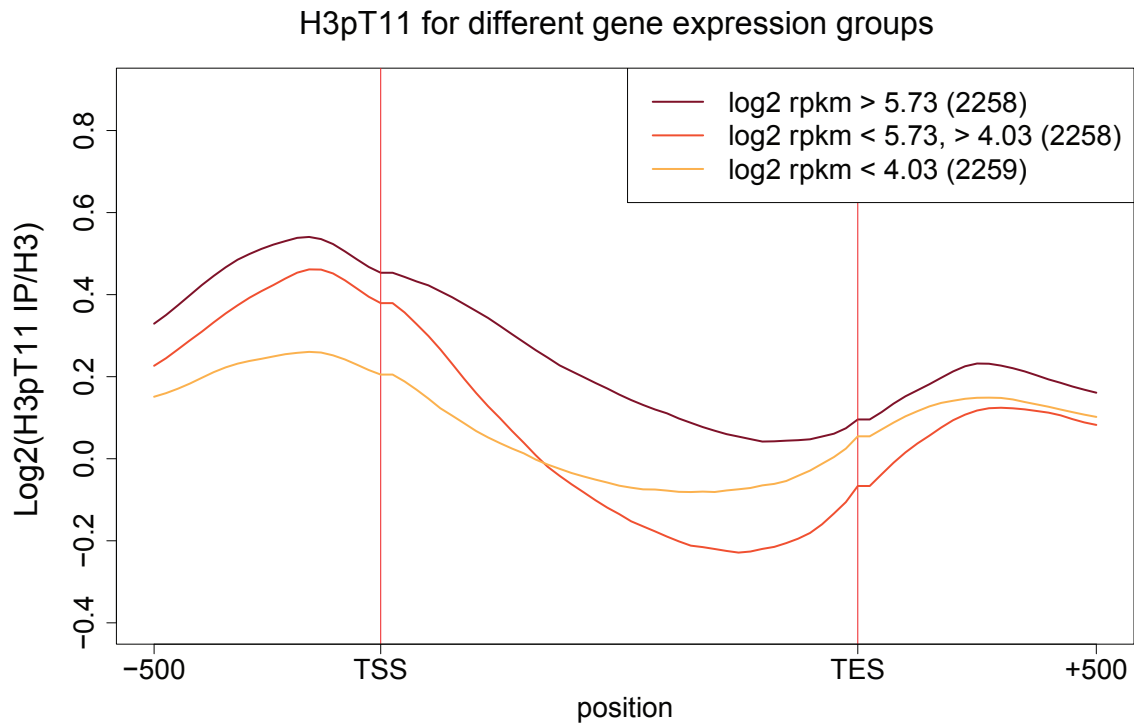

B

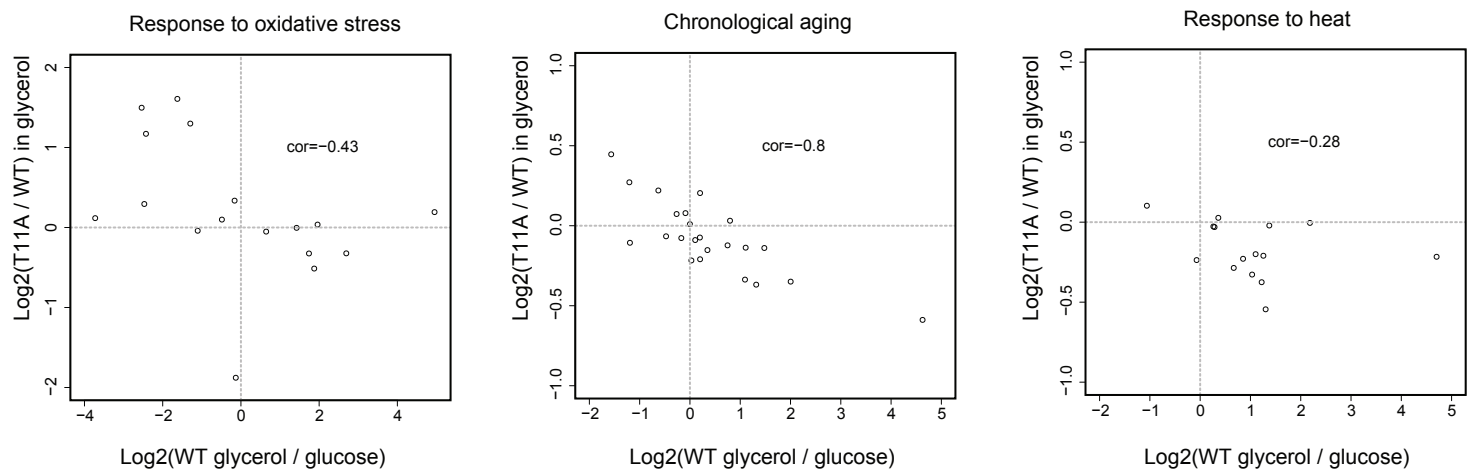

Supplement: supp [file elife-36157-supp-v1.zip]

Figure 3- figure supplement 1

A

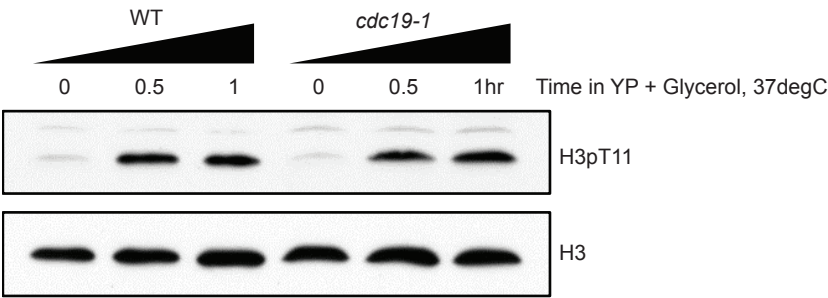

B

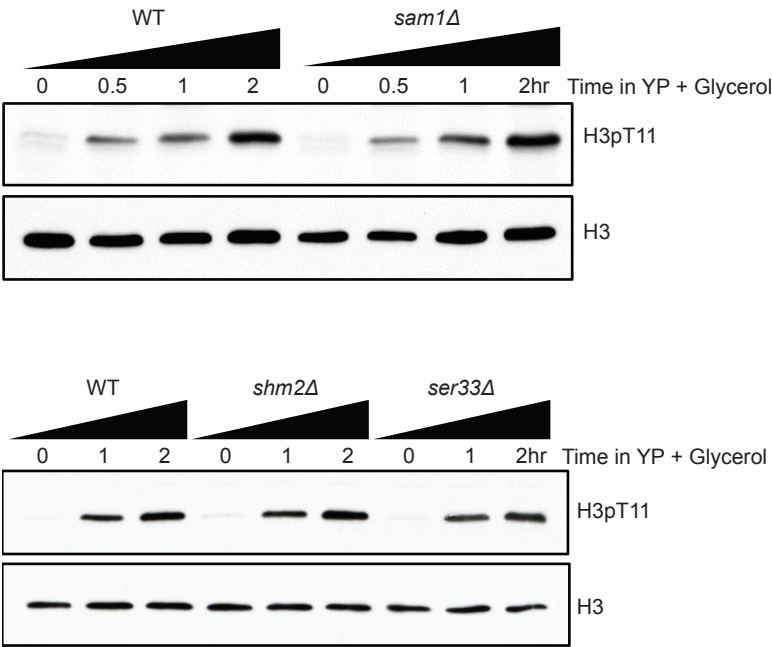

Supplement: supp [file elife-36157-supp-v1.zip]

Figure 6- figure supplement 1

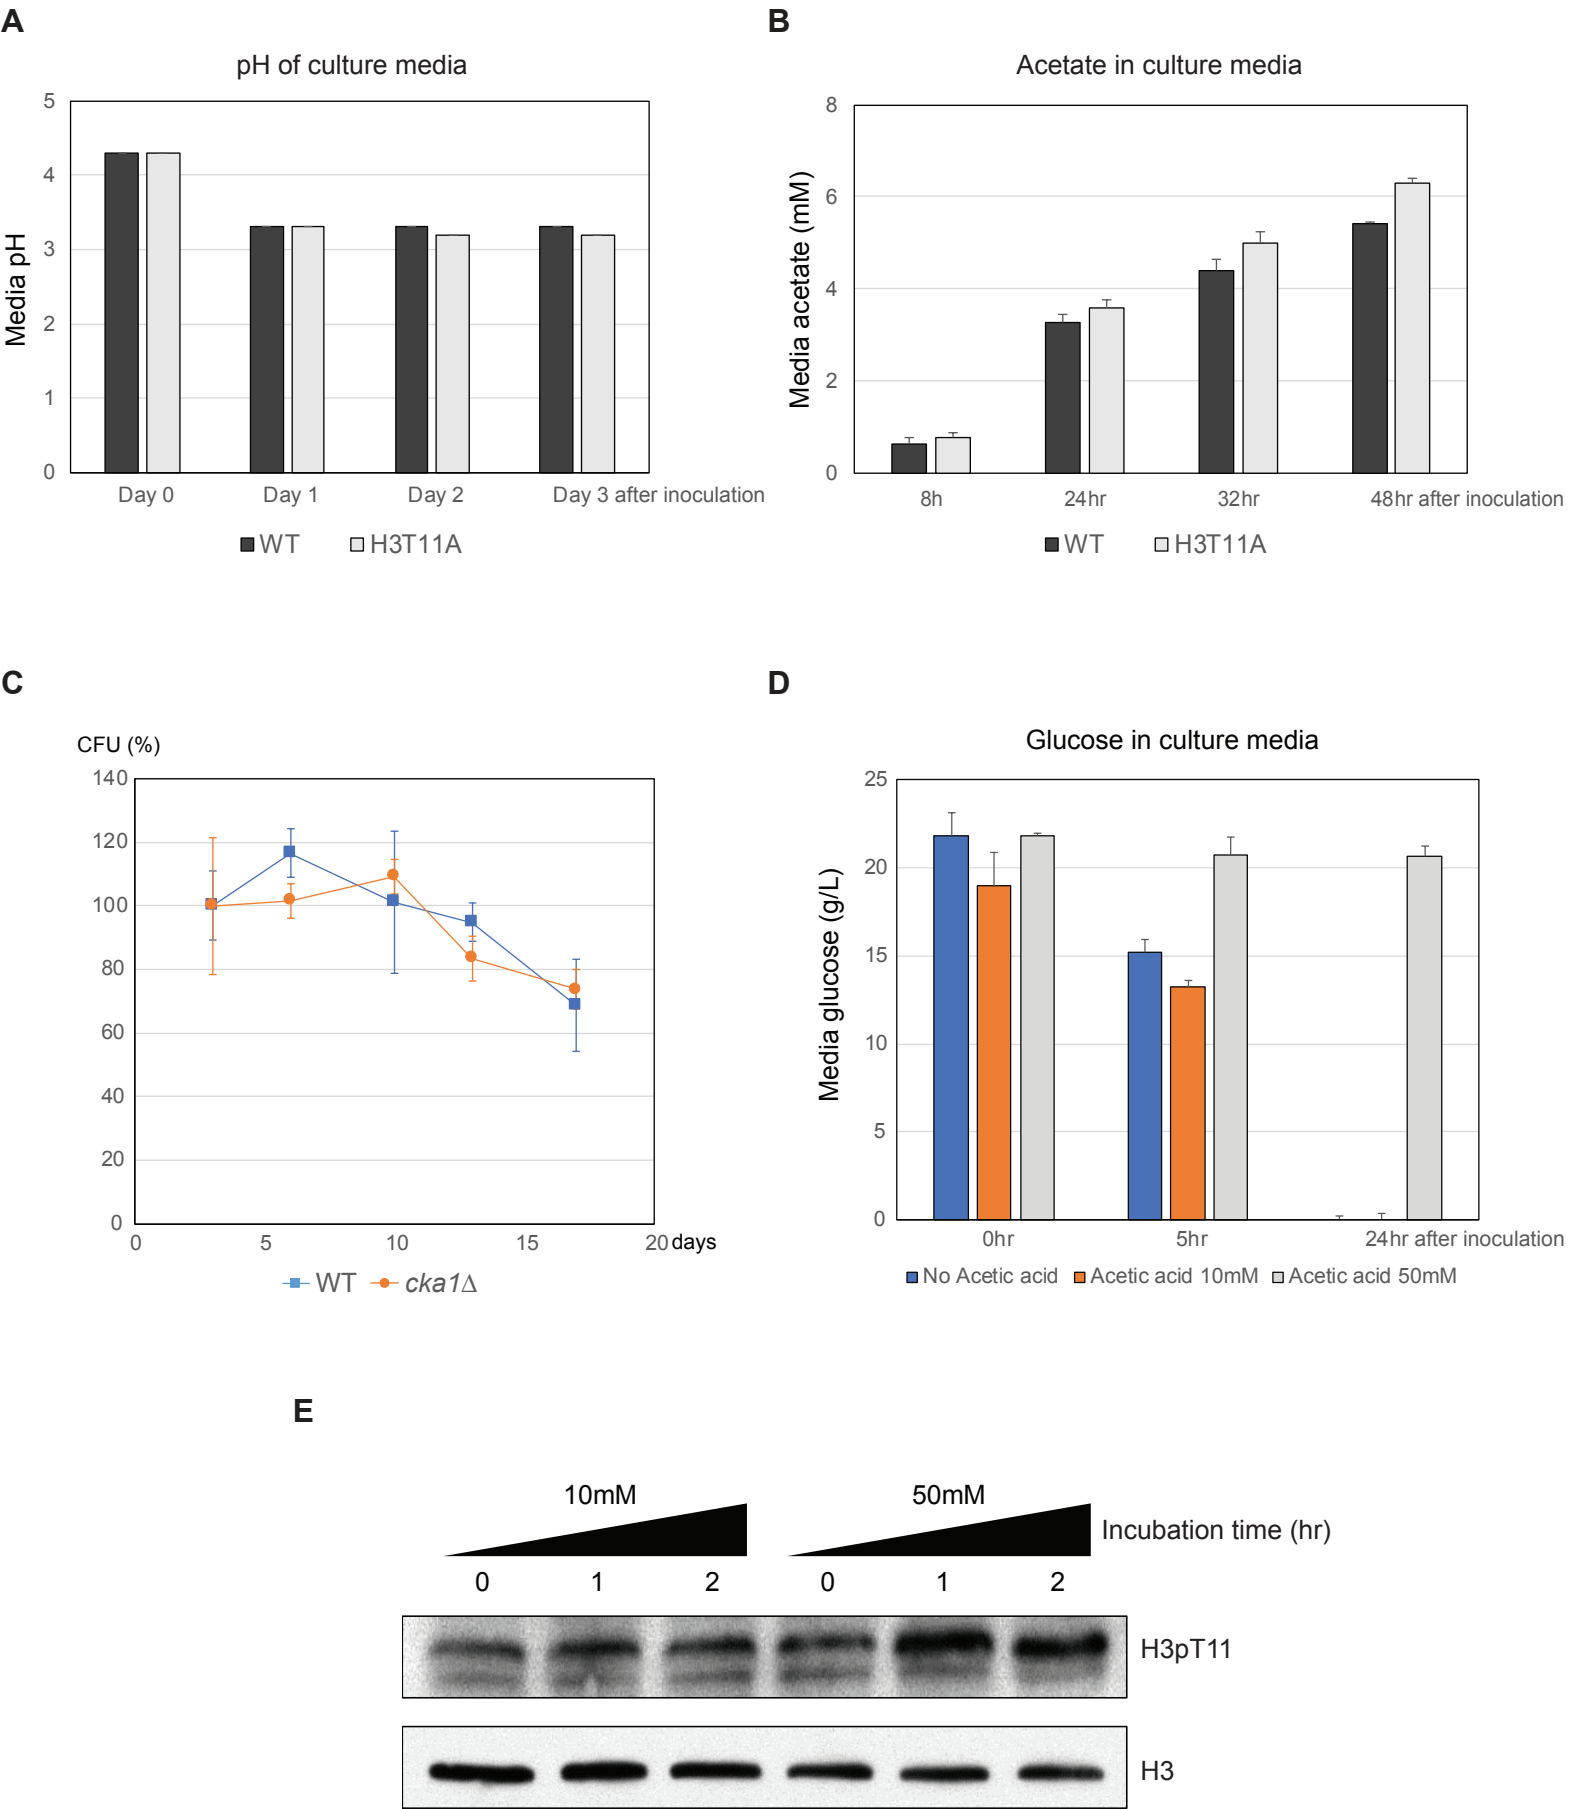

Supplement: supp [file elife-36157-supp-v1.zip]

Figure 3- figure supplement 2

A

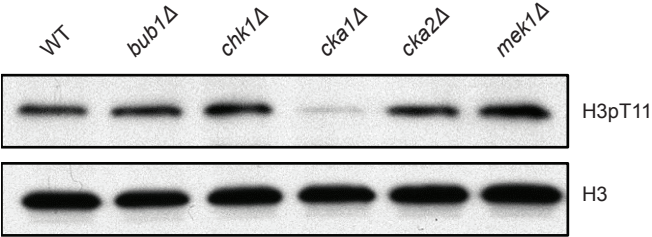

B

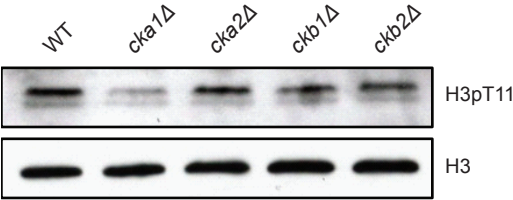

Supplement: supp [file elife-36157-supp-v1.zip]

**Figure 1- figure supplement 1**

**A**

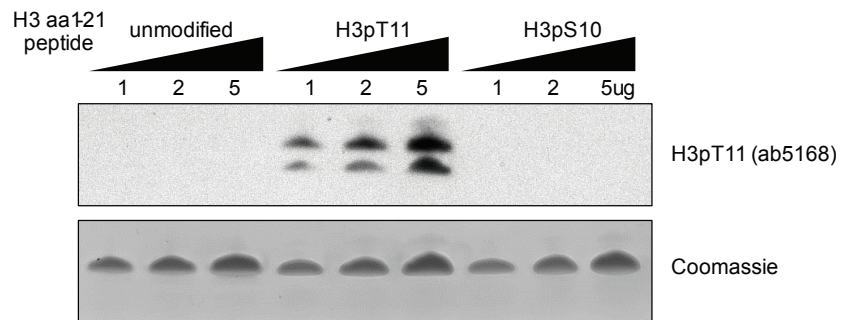

**B**

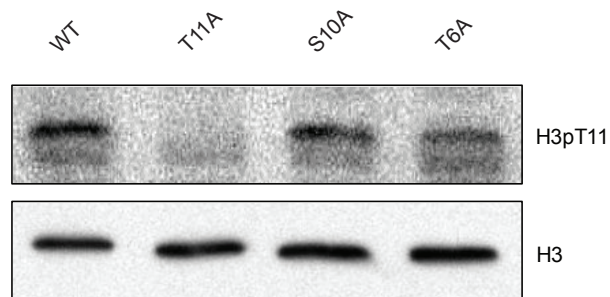

Supplement: supp [file elife-36157-supp-v1.zip]

Figure 1- figure supplement 2

A

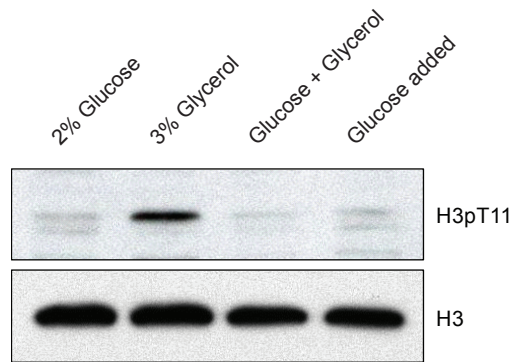

B

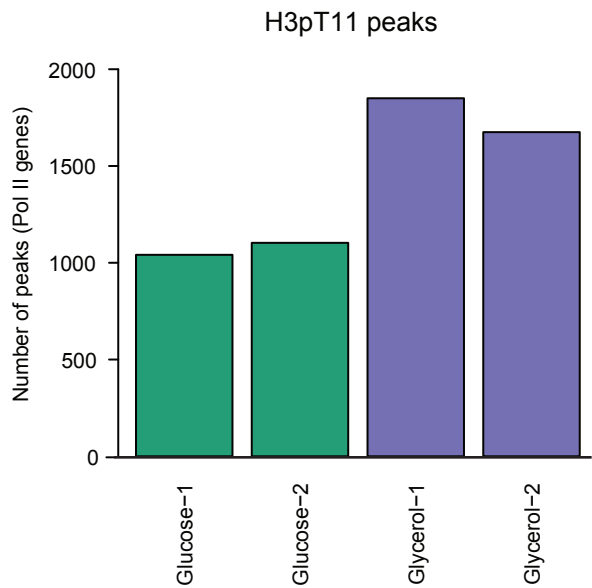

C

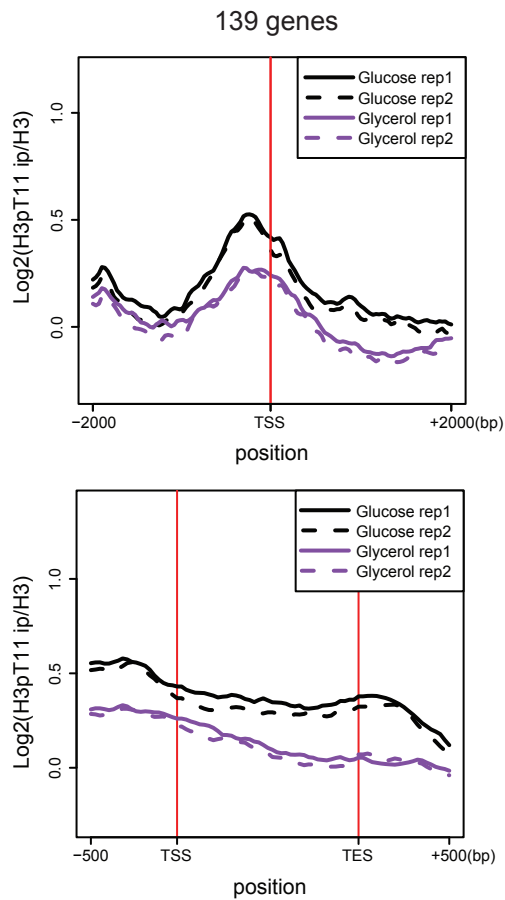

D

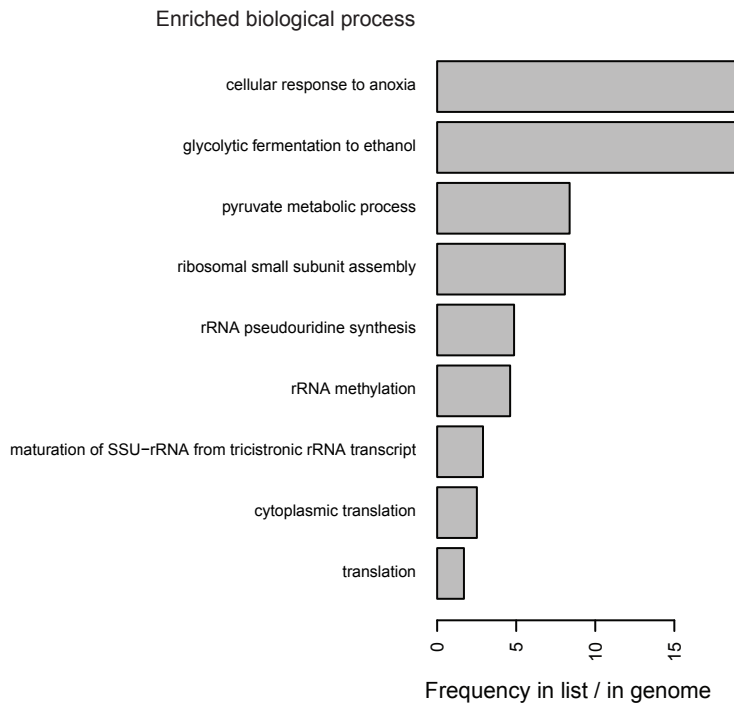

Supplement: supp [file elife-36157-supp-v1.zip]
